# 1 **The Arabidopsis U1 snRNP regulates mRNA 3'-end processing**

2

3 Anchilie F. Mangilet<sup>1\*</sup>, Joachim Weber<sup>1,2</sup>, Sandra Schüler<sup>1,2</sup>, Irina Droste-Borel<sup>3</sup>, Samuel  
4 Streicher<sup>4</sup>, Thomas Schmutzer<sup>4</sup>, Gregor Rot<sup>5</sup>, Boris Macek<sup>3</sup> and Sascha Laubinger<sup>1,2†</sup>

5

6 <sup>1</sup> Institute of Biology and Environmental Sciences, University of Oldenburg, 26129  
7 Oldenburg, Germany

8 <sup>2</sup> Institute of Biology, Department of Genetics, Martin Luther University Halle-Wittenberg,  
9 06099 Halle (Saale), Germany

10 <sup>3</sup> Proteome Center, University of Tuebingen, 72076 Tuebingen, Germany

11 <sup>4</sup> Institute of Agricultural and Nutritional Sciences, Martin Luther University Halle-Wittenberg,  
12 06099 Halle (Saale), Germany

13 <sup>5</sup> Institute of Molecular Life Sciences of the University of Zurich and Swiss Institute of  
14 Bioinformatics, 8057 Zurich, Switzerland

15

16 \*Present address: Max Planck Institute for Plant Breeding Research (MPIPZ), 50829  
17 Cologne Germany

18

19 †Corresponding author: [sascha.laubinger@genetik.uni-halle.de](mailto:sascha.laubinger@genetik.uni-halle.de)

20

21 Keywords: U1 snRNP, U1-70K, U1-C, Splicing, Cleavage and Polyadenylation, Telescripting

22 **ABSTRACT**

23 The removal of introns by the spliceosome is a key gene regulatory mechanism in  
24 eukaryotes, with the U1 snRNP subunit of the spliceosome playing a crucial role in the early  
25 stages of splicing. Studies in metazoans show that the U1 snRNP also conducts splicing-  
26 independent functions, but the lack of genetic tools and knowledge about U1 snRNP-  
27 associated proteins have limited the study of such splicing-independent functions in plants.  
28 Here, we describe an RNA-centric approach that identified more than 200 proteins  
29 associated with the Arabidopsis U1 snRNP, among them mRNA cleavage and  
30 polyadenylation factors. The loss of U1 core components is linked to premature cleavage  
31 and polyadenylation within gene bodies and alternative polyadenylation site selection in 3'-  
32 UTRs. Overall, our work provides a comprehensive view of U1 snRNP interactors and  
33 reveals novel functions in regulating mRNA 3'-end processing in Arabidopsis, thus  
34 establishing the groundwork for a better understanding of non-canonical functions of plant  
35 U1 snRNPs.

36

37 **MAIN**

38 In eukaryotes, the spliceosome removes intronic sequences in mRNAs and subsequently  
39 ligates exons to generate a functional mRNA. Five uridine-rich small nuclear  
40 ribonucleoprotein complexes (U1, U2, U4, U5, and U6 snRNPs) build the spliceosome <sup>1</sup>.  
41 Each of the snRNPs is composed of a specific small nuclear RNA (snRNA) and protein  
42 subunits that are essential for the recognition of splicing signals embedded in the gene  
43 sequences <sup>2</sup>. During the splicing process, the snRNPs assemble in a step-by-step and  
44 accurate manner. The recognition of the 5' splice site (5'SS) by the U1 snRNP initiates the  
45 splicing process. Cryo-electron microscopy has facilitated a more detailed dissection of the  
46 U1 snRNP function, particularly in the early steps of the splicing reaction <sup>3-5</sup>. The core U1  
47 snRNP consists of a 165 nucleotide snRNA that forms four stem-loops, an Sm core ring  
48 (Sm-E, G, D3, B, D1, D2, and F), and three U1 core proteins (U1-A, U1-70K, and U1-C) <sup>6,7</sup>.  
49 Accessory proteins specifically interact with the U1 core snRNP and aid splicing of weak 5'  
50 splice sites <sup>8-11</sup>. In Arabidopsis, core and accessory proteins are conserved, and analyses of  
51 mutants lacking U1 accessory components such as LUC7, PRP39, PRP40, or PRP45  
52 exhibit developmental defects <sup>12-19</sup>. Surprisingly, while a flower-specific RNAi-knockdown of  
53 U1-70K shows developmental defects, two reports describing mutants for the U1 core  
54 components, U1-A and U-70K, did not find any drastic effects, <sup>20-22</sup>. This is in stark contrast  
55 to the fact that U1 core components are essential genes in metazoans <sup>23,24</sup> and it shows that  
56 several aspects of the function of the Arabidopsis U1 snRNP function in plants are not  
57 understood and remain to be answered.

58           The U1 snRNP is also particularly interesting because it is more abundant than other  
59 snRNPs and has early been thought to fulfill additional functions aside from splicing<sup>25</sup>.  
60 Indeed, the U1 snRNP affects mRNA length through regulation of 3'-end processing, it  
61 controls promoter directionality, enhances transcription, and increases the speed of RNA  
62 polymerase II (RNAPII) and it is responsible for retaining lncRNA in the nucleus<sup>6,26-30</sup>.  
63 Probably the best described function of the U1 snRNP is telescripting, by which the U1  
64 snRNP prevents premature cleavage and polyadenylation in introns and thereby ensures  
65 transcription of full-length RNAs<sup>31</sup>. Telescripting function is particularly important for long  
66 genes, which contain long introns and require intact U1 snRNP to complete transcription at  
67 canonical PAS<sup>32</sup>. Environmental cues can also modulate telescripting activity and several  
68 human diseases can be linked to telescripting<sup>33-35</sup>. Whether telescripting exists in plants,  
69 particularly in plants with rather small introns such as Arabidopsis, is currently not known.  
70 Mechanistically, the metazoans U1 snRNP forms a complex with cleavage and  
71 polyadenylation factors (CPAFs), U1-CPAF, which is distinct from U1 snRNP spliceosomal  
72 complexes<sup>36</sup>. The U1-CPAF complex binds nascent RNAs in introns that contain U1 and  
73 CPAF binding sites, but the presence of the U1 snRNP in this complex blocks cleavage-  
74 stimulatory factors from joining the complex<sup>36</sup>.

75           While numerous exciting non-canonical functions of metazoan snRNPs have been  
76 constantly discovered, comprehensive knowledge about the interactors of plant U1 snRNPs,  
77 as well as genetic tools to study the function of U1 snRNP in plants, is still lacking. In this  
78 study, we present the Arabidopsis U1 snRNP interactome and, in addition, generate genetic  
79 resources to investigate the non-canonical functions of the Arabidopsis U1 snRNP. Our  
80 findings demonstrate that the Arabidopsis U1 snRNP plays a splicing-independent role in 3'-  
81 end processing, as it features a telescripting function similar to metazoans, while also  
82 contributing to alternative polyadenylation in 3'UTRs, possibly coupled with a general  
83 function in RNAPII termination.

84

## 85 **RESULTS**

86

### 87 **A compendium of Arabidopsis U1 snRNP-associated proteins**

88 Despite the importance of the U1 snRNP in splicing and beyond, very little is known about  
89 the composition of the U1 snRNP or associated proteins and complexes in plants. To identify  
90 the proteins associated with a plant U1 snRNP complex, we applied “comprehensive  
91 identification of RNA-binding proteins by mass-spectrometry” (CHIRP-MS), which has been  
92 successfully applied to isolate proteins associated with the U1 snRNA or other non-coding  
93 RNAs<sup>37</sup>. We used a biotinylated U1 snRNA antisense probe to purify the Arabidopsis U1  
94 snRNP and analyzed the purified sample by mass spectrometry (U1-IP-MS, Figure 1A). A

95 short-distance cross-linking agent, formaldehyde, preserved also transient interactions of the  
96 U1 snRNP with other proteins and complexes during the purification procedure. To test  
97 whether we can indeed observe also dynamic interaction with this approach, we performed a  
98 similar experiment with an antisense oligonucleotide specific for the U2 snRNA (U2-IP-MS).  
99 The U1 snRNP, as part of the commitment complex, recruits the U2 snRNP for the formation  
100 of the A complex. Hence, we would expect a partially overlapping set of proteins associated  
101 with the U1 and the U2 snRNA. As a negative control, we performed an IP-MS experiment  
102 using an antisense *lacZ* oligonucleotide, the sequence of which is not expected to bind any  
103 RNA encoded in the Arabidopsis genome. Three biological replicates were prepared for  
104 each IP-MS experiment. In total, we were able to identify 908 proteins by MS (Figure 1B,  
105 complete lists on Supplemental Data Set 1).

106 We found 214 proteins significantly enriched in IPs with the U1 snRNA antisense  
107 probe (Figure 1B, Supplemental Table S1). With the U2 snRNA antisense probe, we  
108 retrieved 231 significantly enriched proteins (Figure 1C, Supplemental Table S2). 157  
109 proteins were found to be associated with both the U1 and U2 snRNA antisense probe, while  
110 56 and 73 proteins were specifically associated with the U1 and U2 snRNA antisense probe,  
111 respectively (Figure 1D). The large number of proteins that co-purified with the U1 and U2  
112 snRNA antisense probes indicates that our approach was able to capture transient  
113 interactions that occur e.g. during the formation of the A complex. The effectiveness of the  
114 U1 snRNA IP is further supported by the successful enrichment of known U1 snRNP core  
115 and accessory components; we found known U1 snRNPs components such as U1-A, U1-  
116 70K, LUC7A/B, PRP39, PRP40A and Sm core proteins (SmB, SmD1, SmE, SmG) (Figure  
117 1B, E, Supplemental Table S1). Not a single peptide of the above-mentioned protein was  
118 retrieved in the control IP experiments using the *lacZ* antisense probe (Figure 1E). U1-IP-MS  
119 also enriched splicing factors, many of which are known to interact with the U1 snRNP  
120 including the Serine/Arginine-rich (SR) proteins SR45, SR34, RS40/41, SC35, and SCL30A  
121 (Figure 1F, Supplemental Table S1). We also retrieved other splicing-related proteins, such  
122 as SERRATE and the nuclear cap-binding complex (nCBC), as well as components of the  
123 MOS4-associated complex (MAC), which is the homologue of the metazoan Nineteen-  
124 complex (Figure 1F, Supplemental Table S1)<sup>38-40</sup>. A STRING analysis for functional and  
125 physical interactions among proteins revealed a tight interaction network among the U1  
126 snRNA-associated proteins ( $p$ -value  $< 1.0e-16$ , Supplemental Figure S1)<sup>41</sup>. Enrichment  
127 analysis showed that U1 snRNA-associated proteins feature often RNA binding motifs,  
128 helicases and WD40-repeats (Supplemental Data Set 2). Although U1 snRNA-associated  
129 proteins were mainly involved in splicing, also other biological processes such as RNA  
130 transport, RNA silencing or the regulation of transcription or chromatin assembly were  
131 significantly enriched among U1 snRNA-associated proteins (Supplemental Data Set 2).

132 Taken together, the U1 IP-MS experiment revealed more than 200 proteins, statically or  
 133 dynamically associated with the U1 snRNA and our results suggest functions of the plant U1  
 134 snRNP beyond splicing.

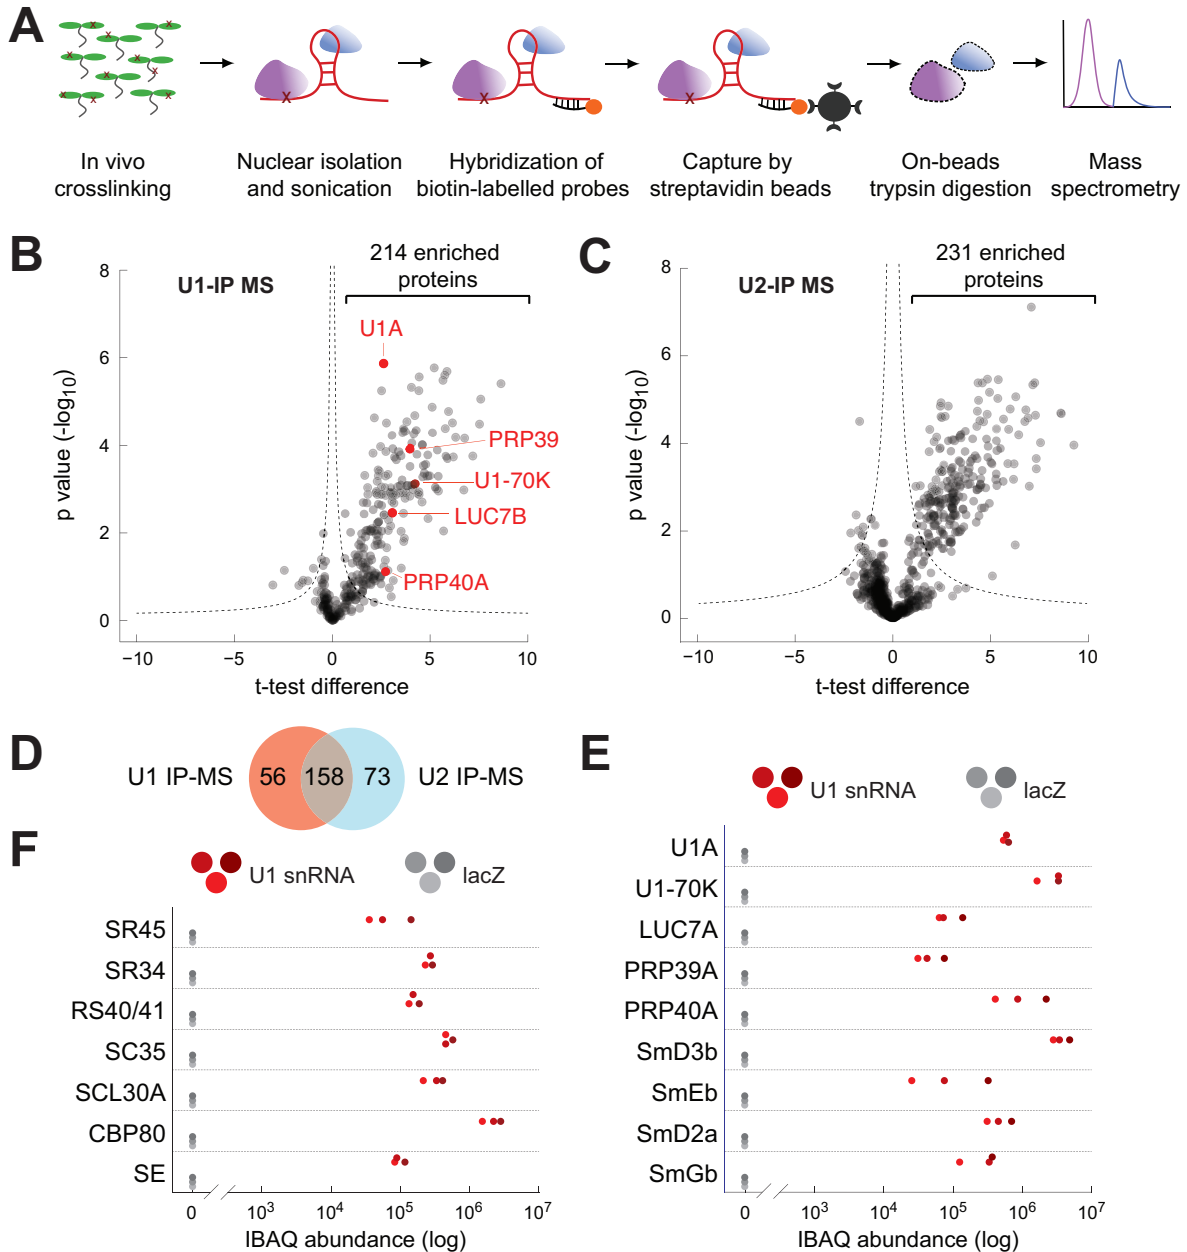

**Figure 1**

**Figure 1: Identification of Arabidopsis U1 snRNP-associated proteins by U1-IP-MS**

**A:** Schematic representation of the U1 snRNA immunoprecipitation followed by mass spectrometry (U1-IP-MS) experiment.  
**B, C:** Analysis of U1 snRNA (B) and U2 snRNA (C) associated proteins identified by IP-MS. Volcano plot of three biological replicates showing significantly enriched proteins immunoprecipitated with a U1 (B) or U2 (C) antisense oligonucleotide compared to a lacZ oligonucleotide (p-value < 0.01). Known U1-specific proteins are highlighted in red (B).  
**D:** Venn diagram depicting the overlap between significantly enriched proteins in U1-IP-MS and U2-IP-MS experiments.  
**E, F:** Abundance of specific proteins in U1-IP-MS experiments. The three red and grey dots represent intensity-based absolute quantification (IBAQ) values of three biological replicates using the U1 or the lacZ antisense oligonucleotide, respectively. Proteins known to be part of the U1 snRNP (E) and selected proteins that function in splicing and RNA processing (F) are shown.

136 **The Arabidopsis U1 snRNP is essential for plant development and transcriptome**  
137 **integrity**

138 To study the functions of the Arabidopsis U1 snRNP and its possible function beyond  
139 splicing, the research community lacks plants with reduced levels of core U1 proteins, which  
140 cause drastic phenotypic alterations. To address this issue, we generated U1 snRNP  
141 knockdown lines through the use of artificial microRNAs (amiRNAs) that targeted the two U1  
142 core subunits U1-70K and U1-C specifically (referred to as *amiR-u1-70k* and *amiR-u1-c*,  
143 Figure 2A). This resulted in a reduction of their mRNA levels to approximately 10% of that  
144 found in WT plants (Figure 2B, C). We speculated that targeting two different genes  
145 encoding proteins forming a common complex would result in similar mutant phenotypes.  
146 Indeed, the knockdown of the core U1 subunits U1-C and U1-70K resulted in plants  
147 exhibiting pleiotropic defects in plant development, including dwarfism and abnormal leaf  
148 development (Figure 2 E-F). While these plants produced a reduced amount of seed, their  
149 ability to develop viable seeds despite their extreme phenotype makes them a valuable  
150 genetic tool for the entire research community. The altered phenotypes were observed in the  
151 vast majority of primary transformants, with the knockdown of *U1-C* always leading to slightly  
152 more severe phenotypic alterations (Figure 2 E-F).

153 To determine whether the reduction of *U1-70K* and *U1-C* expression also had  
154 comparable effects on the transcriptome, we performed a short-read RNA-seq experiment  
155 using WT, *amiR-u1-70k*, and *amiR-u1-c* plants with two to three replicate measurements. In  
156 total, we found 2,714 and 2,183 significantly up-regulated and 2,672 and 2,061 significantly  
157 down-regulated genes *amiR-u1-70k* and *amiR-u1-c* lines, respectively, when compared to  
158 WT plants (Supplemental Data Set 3). A significant number of up- (1233) and down-  
159 regulated (1122) genes overlap between *amiR-u1-70k* and *amiR-u1-c* plants (Figure 2G),  
160 which further supports the idea that knocking down two different genes encoding proteins of  
161 the U1 snRNP result in similar molecular phenotypes.

162 Because U1-70K and U1-C likely fulfill key functions during splicing, we globally  
163 evaluated splicing changes in *amiR-u1-70k* and *amiR-u1-c* lines using the above-described  
164 short-read RNA-seq data set and rMATS for bioinformatics analysis<sup>42</sup>. Alternative splicing  
165 events were grouped into different categories: exon skipping, alternative 5'SS or 3'SS, intron  
166 retention and mutually exclusive exons (Figure 3A). The largest number of affected  
167 transcripts belonged to the exon skipping category (Figure 3A,B, Supplemental Data Set 4).  
168 U1 knockdowns in metazoans or mutants in U1 accessory factors such as LUC7 show very  
169 similar patterns in splicing defects<sup>19,24,43</sup>, which is likely due to the altered connection  
170 between the U1 and U2 snRNP. More than half of the significant exon skipping events  
171 detected were shared between the *amiR-u1-70k* and *amiR-u1-c* lines, which again strongly  
172 suggests that both independent knockdown lines have highly similar defects (Figure 3A,B,



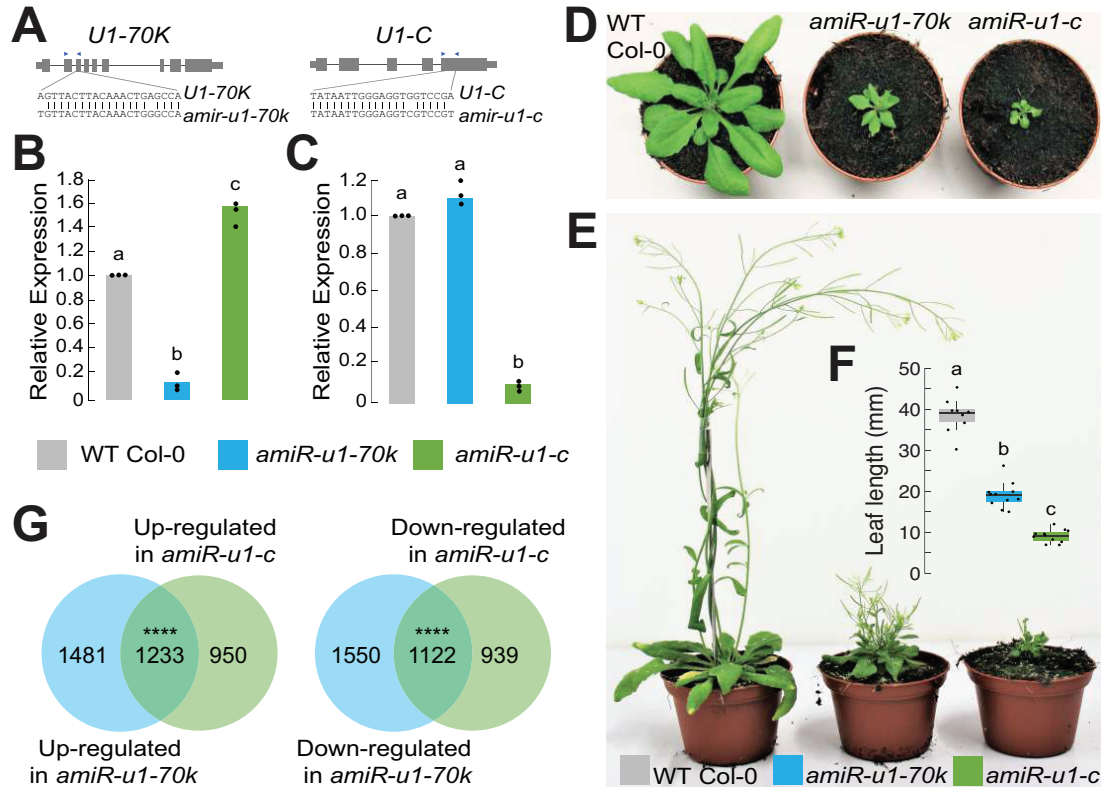

## Figure 2

**Figure 2: Knock-down of two U1 snRNP core components, U1-70K and U1-C, drastically affects plant development and gene expression**

**A:** Gene models of *U1-70K* and *U1-C* and regions used for the design of artificial miRNAs (*amiRNAs*). The blue rectangle indicates the position of PCR primers used for qPCR in Figure 2B.

**B, C:** qRT-PCR analysis of *U1-70K* and *U1-C* levels in seven-day-old WT, *amiR-u1-70k* and *amiR-u1-c* seedlings. The bars indicate the average relative expression in three biological replicates, dots represent indicate the three independent measurements. The letters indicate the statistical significance tested using ANOVA followed by Tukey's honestly significant difference test (Tukey's HSD) for pairwise comparison with a significance threshold of  $p < 0.05$ .

**D, E:** Gross phenotypes of WT, *amiR-u1-70k*, and *amiR-u1-c* plants grown for 21 days (D) or 56 days (E) under long day (16h light/8h darkness) conditions.

**F:** Leaf length of WT, *amiR-u1-70k*, and *amiR-u1-c* plants, measured after 21 days. The bars indicate the average leaf length, dots represent individual leaf length measurements. The letters indicate the statistical significance tested using ANOVA followed by Tukey's honestly significant difference test (Tukey's HSD) for pairwise comparison with a significance threshold of  $p < 0.05$ .

**G:** Venn diagrams depicting the overlap of differentially expressed genes in *amiR-u1-70k* and *amiR-u1-c* compared to WT. Expression was determined by RNA-seq and differentially expressed were considered all genes that significantly differed between WT and U1 knockdown line (padjusted  $< 0.05$ ).

173

174

175

176

177

178

179

180

181

182

Supplemental Data Set 4). Also, other splicing defects were found in the U1 knockdown lines which shows that an intact U1 is essential for splicing fidelity in general (Figure 3A,B, Supplemental Data Set 4). The changes in alternative splicing were not due to the mRNA abundance and expression, because we found no significant overlap between alternatively spliced mRNA and differential gene expression (Supplemental Data Set 5). To confirm some of the splicing defects detected using rMATS, we performed RT-PCR with different biological replicates and primers flanking regions of alternative splicing events found in both U1 knockdown lines (Figure 3C). In addition, we performed Oxford Nanopore Technologies (ONT) direct RNA-seq with additional biological replicates of WT, *amiR-u1-70k*, and *amiR-*

183 *u1-c* plants. While the total number of reads obtained by direct RNA-seq was too low to  
 184 perform global splicing analysis, the coverage plots of selected splicing events clearly  
 185 confirmed the short-read RNA-seq analysis (Figure 3D).

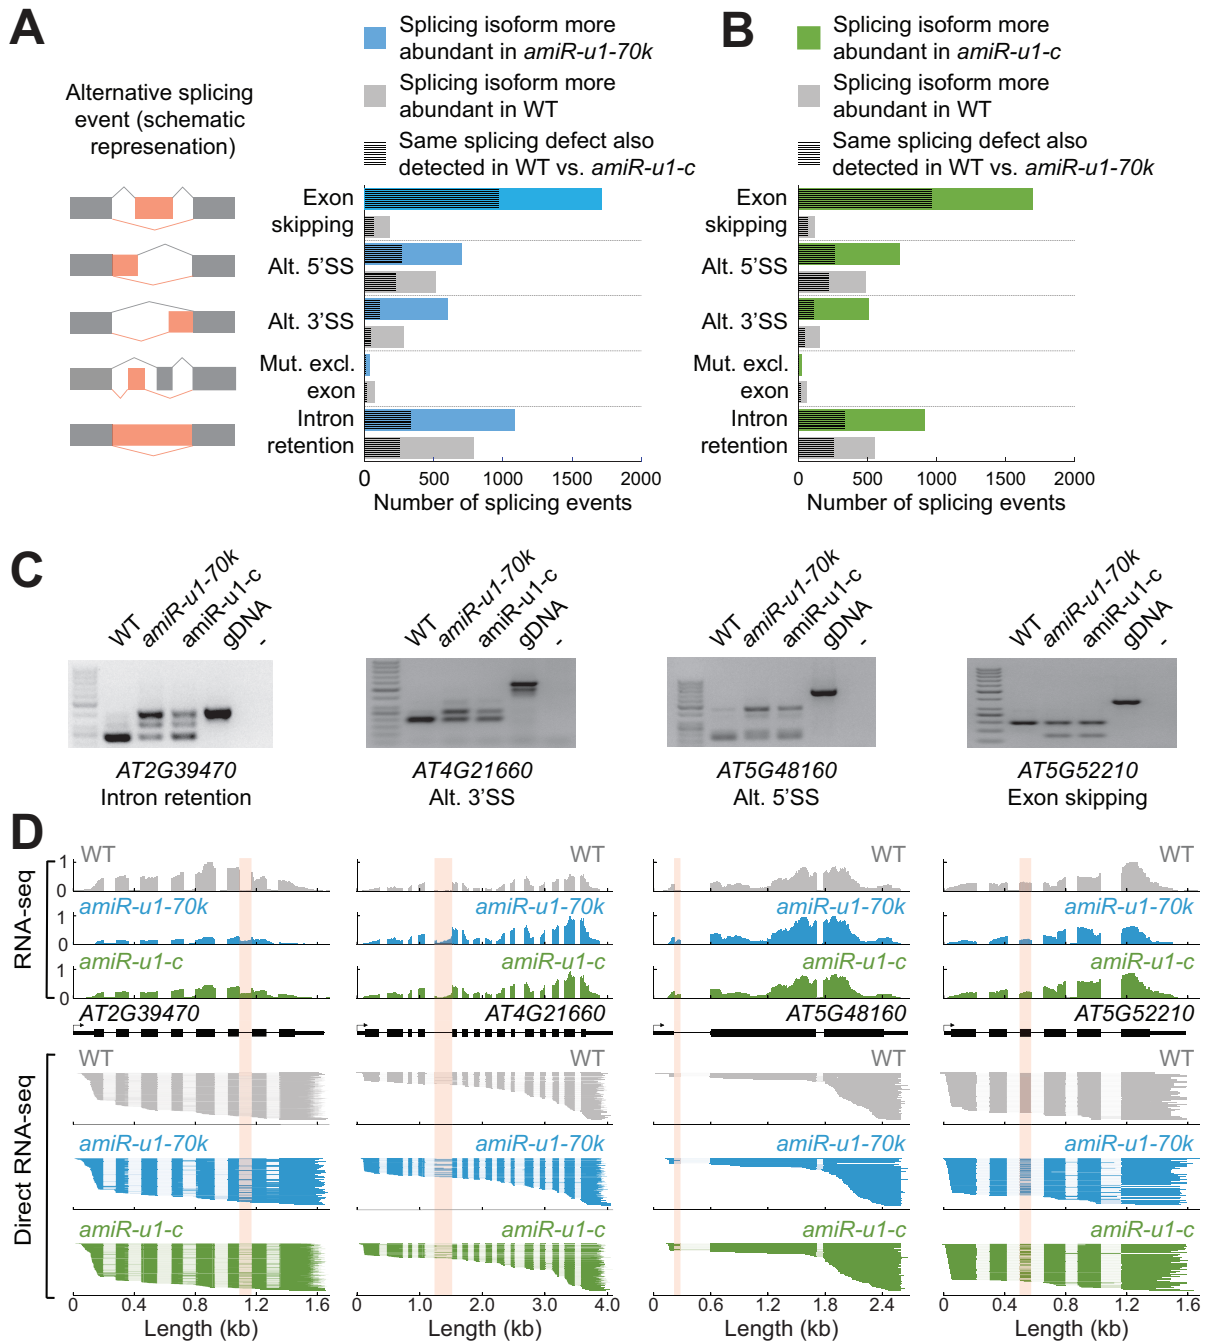

### Figure 3

**Figure 3: Knock-down of U1-70K or U1-C causes overlapping splicing defects**

**A, B:** Changes in the splicing pattern were calculated based on RNA-seq data from WT, *amiR-u1-70k*, and *amiR-u1-c* plants using rMATS. Splicing changes were subcategorized into exon skipping, alternative 5'splice site (alt. 5'SS), alternative 3'splice site (alt. 3'SS), mutually exclusive exons (mut. Excl. exon), and intron retention. A schematic representation of the different splicing changes is shown in A.

**C:** RT-PCR analysis of selected alternative splicing events detected in the RNA-seq data set. Primers used for amplification were designed to flank the splicing event.

**D:** ONT direct RNA-seq reads aligned to the genes that produced alternative spliced RNAs (C). The coverage plot of one representative replicate of the RNA-seq data set used for rMATS analysis (A, B) is shown. Pink boxes indicate the alternative splicing events detected by rMATS.



187 Taken together, these results show the importance of the U1 snRNP in maintaining  
188 the normal development of plants and highlight the significance of the U1 snRNP for  
189 transcriptome integrity and splicing fidelity. Furthermore, U1 knockdown lines might serve as  
190 a powerful tool for studying functions of the Arabidopsis U1 snRNP beyond splicing.

191

### 192 **The Arabidopsis U1 snRNP associates with components of the cleavage and** 193 **polyadenylation complex (CPSF)**

194 Our U1 IP-MS implied that the Arabidopsis U1 snRNP fulfills additional functions beyond  
195 splicing, which we now could address using the U1 knockdown lines. Among the 214 U1  
196 snRNA-associated proteins we identified by U1 IP-MS, we found several cleavage and  
197 polyadenylation factors (CPAFs), including components of the cleavage and polyadenylation  
198 complex (CPSF) (Figure 4A, Supplemental Table S1). The CPSF recognizes the  
199 polyadenylation signal (in metazoans AAUAAA), cleaves the pre-mRNA, and recruits  
200 poly(A)polymerases for polyadenylation<sup>44</sup>. CPSF acts in concert with other complexes such  
201 as the Cleavage Stimulation Factor (CstF), Cleavage Factor I, and Cleavage Factor II (CFI  
202 and CFII)<sup>45</sup>. These complexes bind additional cis-regulatory elements, including upstream  
203 sequence elements (USE) and downstream sequence elements (DSE). While the canonical  
204 polyadenylation signal motif AAUAAA is less well-conserved in plants, which possess a  
205 variety of A and U-rich elements, the proteins involved in cleavage and polyadenylation  
206 remain highly conserved<sup>46-48</sup>. The CPSF consists of several subunits: CPSF73, CPSF160,  
207 CPSF30, WDR33, FIP1, and CPSF100. CPSF73 functions as an endonuclease and is  
208 encoded by two essential genes in Arabidopsis, CPSF73-I and CPSF73-II<sup>49-51</sup>. FY is the  
209 WDR33 homolog in Arabidopsis and recognizes the PAS in concert with CPSF160<sup>52-54</sup>.  
210 Mutations in the CPSF components showed mild to drastic phenotypic alterations and  
211 changes in mRNA cleavage and polyadenylation<sup>49-51,55-60</sup>.

212 We found CPSF73-I, CPSF160, and FIP1 among the 214 significant proteins  
213 identified by U1 snRNA IP-MS, suggesting that U1 snRNP forms a high-order complex with  
214 the CPSF (Figure 4A). To check this notion, we tested whether protein components of the  
215 U1 snRNP co-immunoprecipitate with the CPSF. For this, we transiently co-expressed RFP-  
216 U1-A and HA-CPSF73-I fusion proteins and performed affinity purifications using an anti-  
217 RFP affinity matrix. HA-CPSF73-I co-purified with RFP-U1-A, but not RFP, which suggests a  
218 physical interaction between proteins of the U1 snRNP and the CPSF (Figure 4B). The U1  
219 snRNA IP-MS also contained peptides for two other CPSF subunits, WDR33/FY and  
220 CPSF30, but failed to reach the significance threshold (Figure 4A, Supplemental Data Set  
221 1). Still, we also found that YPF-FY co-immunoprecipitated with RFP-U1-A, but not with RFP  
222 (Figure 4C). These co-immunoprecipitations of HA-CPSF73-I with RFP-U1-A and YPF-FY  
223 with RFP-U1-A, as well as the presence of CPSF73-I, CPSF160, and FIP1 in the U1-IP-MS

224 experiments, strongly support the physical interaction between the Arabidopsis U1 snRNP  
 225 and CPSF. The U1-IP-MS also retrieved a component of the CFI complex, AtCFI68, which  
 226 bind to the USE (Figure 4D). This suggests that the U1 snRNP may interact with other  
 227 components involved in cleavage and polyadenylation, in addition to CPSF components.

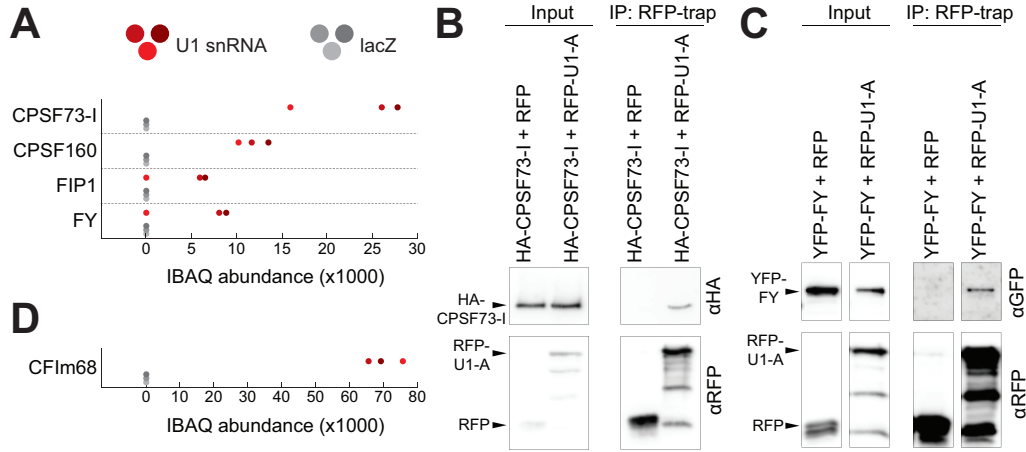

**Figure 4**

**Figure 4: The U1 snRNP associated with components of mRNA cleavage and polyadenylation complexes**  
**A, D:** Abundance of cleavage and polyadenylation factors (CPAFs) in U1-IP-MS experiments. The three red and grey dots represent intensity-based absolute quantification (IBAQ) values of three biological replicates using the U1 or the lacZ antisense oligonucleotide, respectively.  
**B, C:** U1-A translationally fused to RFP was coexpressed with an HA-tagged CPSF73-I (B) or a YFP-tagged FY (C) in *Nicotiana benthamiana* plants for transient protein expression. RFP alone served as a negative control. Proteins were isolated and immunoprecipitated using an RFP-affinity matrix. Input and immunoprecipitated fractions (IP) were subjected to protein blot analysis using RFP, HA, and YFP-specific antibodies. Unprocessed blots are available in Figure S2.

228

229 **The Arabidopsis U1 snRNP features telescripting function and promotes the selection**  
 230 **of canonical polyadenylation sites at the 3'-ends of genes**

231 Given the association of the Arabidopsis U1 snRNP with CPSF components, we investigated  
 232 its potential role in regulating transcript cleavage and polyadenylation. To address this, we  
 233 utilized the above-described U1 knock-down lines and performed 3'-end mRNA sequencing  
 234 with WT, *amiR-u1-70k*, and *amiR-u1-c* plants. In this data set, we could detect approximately  
 235 18,000 genes that undergo alternative polyadenylation (APA), with the majority of genes  
 236 exhibiting more than 4 polyadenylation sites (Supplemental Data Set 6). Changes in the  
 237 usage of the polyadenylation site were categorized into enhanced and repressed alternative  
 238 polyadenylation (APA) events. The term “enhanced APA” refers to cases where proximal  
 239 polyA site usage is higher in WT than in the U1 knockdown lines (Figure 5A), while the term  
 240 “repressed APA” indicates that the usage of the proximal polyA site in WT is lower than in  
 241 the U1 knockdown lines (Figure 5A). We found 467 enhanced and 484 repressed PAS sites  
 242 in *amiR-u1-70k* plants, and 507 enhanced and 693 repressed PAS sites in *amiR-u1-c* plants  
 243 (Figure 5B,C, Supplemental Data Set 6). Among these, a significant number of enhanced  
 244 (176, p-value: 6.71e-67) and repressed (102, p-value: 1.24e-06) PAS were shared between

245 *amiR-u1-c* and *amiR-u1-70k* lines, suggesting that U1-C and U1-70K serve similar functions  
246 in PAS utilization (Figure 5B, C).

247 We further categorized the APA events into three different categories (Figure 5D)<sup>61</sup>:  
248 First, proximal and distal polyA-sites are located in the “same exon”. Second, “composite  
249 exon APA” describe APA events that are located on distinct exons. This category should  
250 include, e.g. premature polyadenylation events in annotated introns generated by the lack of  
251 telescripting. Third, “skipped exon” events refer to alternative polyadenylation events in  
252 which the proximal poly(A)site is located in a skipped exon when the distal poly(A) site is  
253 utilized. We observed interesting trends for “composite exon” and “same exon” APA events,  
254 but no pronounced trend in the “skipped-exon” category was found in *amiR-u1-70k* and  
255 *amiR-u1-c* plants (Figure 5E, Figure S2 Supplemental Data Set 6).

256 Both U1 knockdown lines exhibited more repressed than enhanced “composite exon”  
257 APA events, indicating that the proximal PAS was utilized more frequently utilized than the  
258 distal PAS in U1 knockdown lines (Figure S3, Supplemental Data Set 6). The repressed  
259 “composite exon” APA events also significantly overlapped (38 events, p-value: 1.19e-24)  
260 between *amiR-u1-70k* (279 events) and *amiR-u1-c* lines (93 events), suggesting that both  
261 U1 components target a common set of genes for this type of APA regulation (Figure 5E,  
262 Supplemental Data Set 6). Additionally, we detected an accumulation of shorter transcript  
263 isoforms for the selected significant repressed “composite exon” APA events by ONT direct  
264 RNA-seq (exemplified in Figure 5F). While these shorter transcripts were also detectable in  
265 WT plants, they accumulated to higher levels in both U1 knockdown lines (Figure 5F). These  
266 results suggest that Arabidopsis genes can generate shorter mRNA through premature  
267 polyadenylation in introns, but that the U1 snRNP telescripting function represses the  
268 pervasive usage of such premature PAS, akin to the telescripting function of the U1 snRNP  
269 in metazoans.

270 A closer look at the same exon APA events revealed a slightly different picture: Both  
271 U1 knockdown lines exhibited more enhanced than repressed “same exon” APA events, and  
272 these events significantly overlapped between both knockdown lines (Figure 5E,  
273 Supplemental Data Set 6). The increased usage of more distal PAS in this subset of genes  
274 led to the generation of longer mRNAs in U1 knock-down lines. These results show that  
275 upon U1 knockdown in Arabidopsis, a subset of genes utilized more distal poly(A) sites in  
276 terminal exons to produce longer mRNAs (exemplified in Figure 5G). These results suggest  
277 at least two distinct functions of the U1 snRNP during polyadenylation: First, the Arabidopsis  
278 U1 snRNP suppresses premature polyadenylation in gene bodies through telescripting.  
279 Second, the Arabidopsis U1 snRNP promotes the selection of proximal, canonical  
280 polyadenylation sites at the 3'-end of mRNAs.

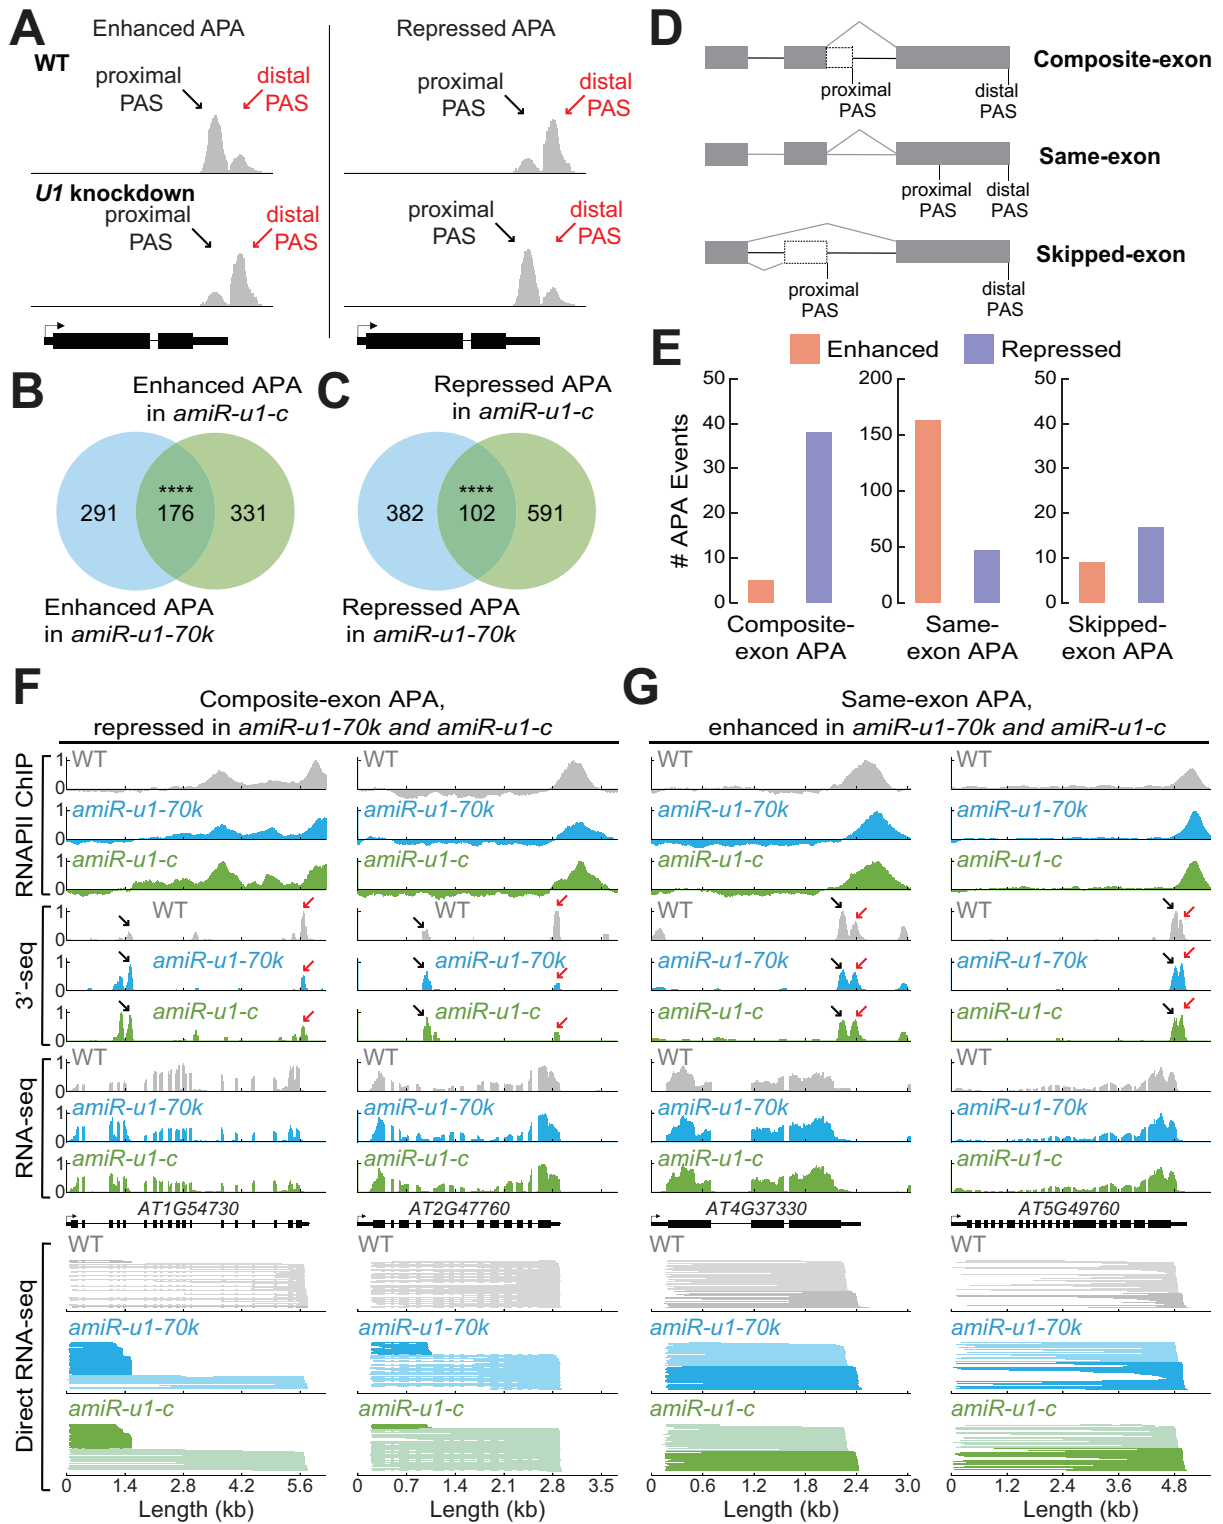

Figure 5

**Figure 5: The U1 snRNP regulates alternative polyadenylation in Arabidopsis**

**A:** A schematic representation of enhanced and repressed alternative polyadenylation (APA). In enhanced APA events, the proximal PAS site is preferentially utilized. In repressed APA events, the distal PAS site is preferentially utilized. Black arrows indicate the proximal PAS and red arrows indicate the distal PAS.

**B, C:** Polyadenylation sites were detected by 3'-end sequencing of RNAs (3'-seq) experiments using RNA isolated from seven-day-old WT, *amiR-u1-70k*, and *amiR-u1-c* seedlings. Venn diagrams depict the overlap of enhanced (B) or repressed (C) APA sites in *amiR-u1-70k* and *amiR-u1-c* when compared to WT.

**D:** A schematic representation of three different types of APA, same-exon APA, composite-exon APA, and skipped exon APA.

**E:** Number of different APA events detected in both *amiR-u1-70k* and *amiR-u1-c* plants, when compared to WT. Same-exon APA, composite-exon APA, and skipped-exon APA events were further divided into enhanced and repressed events.

**F:** Two examples of composite-exon APA events, that are repressed in *amiR-u1-70k* and *amiR-u1-c* plants. The figure depicts the gene models and the corresponding of coverage plots for 3'-seq, RNA-seq, direct RNA-seq, and polymerase II association (RNAPII ChIP).

**G:** Two examples of same-exon APA events are enhanced in *amiR-u1-70k* and *amiR-u1-c* plants. The figure depicts the gene models and the corresponding of coverage plots for 3'-seq, RNA-seq, direct RNA-seq, and polymerase II association (RNAPII ChIP).

282

283 **Usage of distal polyA sites in U1 knockdown might be linked to the release of RNAPII**

284 Two models explain how transcription by RNAPII can be terminated. The allosteric model  
285 proposes that transcription of the PAS induces a structural change leading to termination.

286 The torpedo model suggests that after RNA cleavage, the 5'-3' exonuclease XRN2 rapidly  
287 degrades the remaining RNAPII-associated RNA causing termination. More recent data  
288 suggest a combined model, in which structural changes facilitate catch-up of RNAPII by  
289 XRN2<sup>62</sup>. Consistently, the knockdown of factors such as human XRN2 or CPSF73 results in  
290 the production of longer transcripts and pile up RNAPII further downstream of the PAS<sup>62,63</sup>.

291 Since we observed increased usage of distal PAS in terminal exon at some genes  
292 upon U1 knockdown, we asked whether RNAPII termination is also affected in U1  
293 knockdown lines. To test this, we performed RNAPII Chromatin Immunoprecipitation (ChIP)  
294 experiment experiments followed by sequencing (ChIP-seq) with WT and U1 knockdown  
295 lines. At genes with enhanced "same exon" events in *amiR-u1-70k* and *amiR-u1-c*, RNAPII  
296 piled up downstream of the RNAPII peak at 3'-ends observed in WT (Figure 6A, exemplified  
297 for individual genes in Figure 5G). These results indeed suggest that RNAPII terminates  
298 more downstream at this subset of genes upon U1 knockdown. We observed a similar trend  
299 for many more genes, although the 3'-end sequencing did not detect any changes in PAS  
300 usage between U1 knockdown lines and WT (exemplified in Figure 6B). We therefore  
301 decided to investigate the RNAPII distribution among all Arabidopsis genes in WT and U1  
302 knockdowns, irrespectively whether utilizing distal PAS in the same exon accumulates in U1  
303 knockdowns. Also, the RNAPII globally observed a shift of the RNAPII accumulation in  
304 *amiR-u1-70k* and *amiR-u1-c* lines. We observed a pronounced RNAPII shift to more distal  
305 sites and reduced accumulation of RNAPII at 3'-ends of genes in *amiR-u1-70k* and  
306 *amiR-u1-c* lines (Figure 6C), which might suggest a general role of the Arabidopsis U1  
307 snRNP in transcription termination. The reason why we did not detect longer mRNAs when  
308 RNAPII terminate more shifts to more distal sites might be the lack of utilizable PAS site or  
309 the fact that long 3'UTRs of mRNAs trigger non-sense mediated mRNA decay (NMD)<sup>64,65</sup>.  
310 Then, the full consequences of U1 knockdown on the Arabidopsis transcriptome might only

311 be detectable in U1 knock-down plants, which are also impaired in NMD or other RNA  
 312 quality control mechanisms.

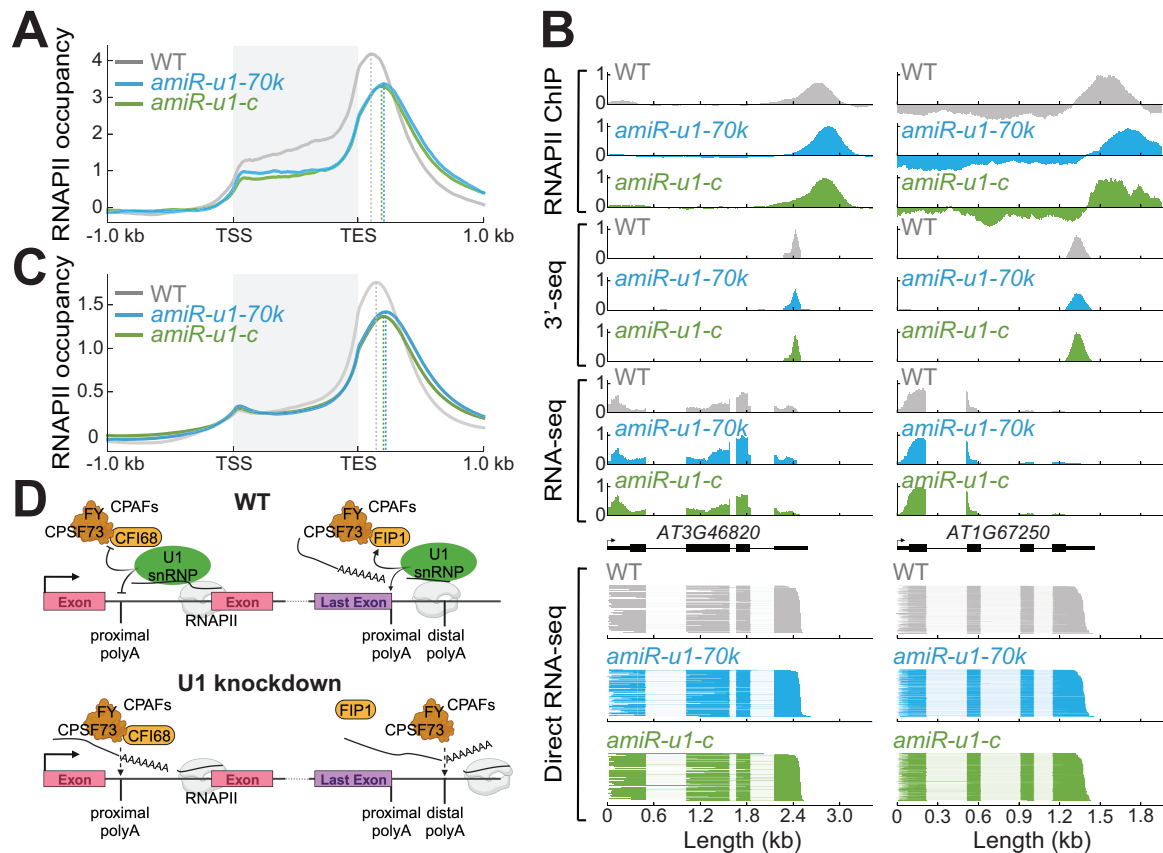

**Figure 6**

**Figure 6. The U1 snRNP affects the distribution of RNA polymerase II at the 3' end of genes**

**A:** Meta plot analysis of RNAPII binding in WT, *amiR-u1-70k*, and *amiR-u1-c* plants to all genes that utilize more distal polyA in 3'UTRs in *amiR-u1-70k* and *amiR-u1-c* plants (same-exon APA events that are enhanced in *amiR-u1-70k* and *amiR-u1-c* plants, see Figure 5F for individual examples).

**B:** Two examples of genes that exhibit a shift of RNAPII accumulation at the 3' end, but the mRNA of which are not subjected to APA. Along with the polymerase II association (RNAPII ChIP) at each locus, coverage plots for 3'-seq, RNA-seq, and direct RNA-seq polymerase II are shown.

**C:** Meta-plot analysis of RNAPII binding to all genes in WT, *amiR-u1-70k*, and *amiR-u1-c* plants.

**D:** Proposed model for the function of the U1 snRNP in RNA 3' processing. The U1 snRNP associates with cleavage and polyadenylation factors (CPAFs), including CPSF77-I, FY, CFI68, and FIP1. These interactions prevent premature intronic polyadenylation or ensure the usage of proximal polyadenylation sites in the last exons. In the absence of U1 snRNP function, intronic polyadenylation occurs, and more distal polyadenylation sites are utilized in the last exons.

313

314 **DISCUSSION**

315 In this work, we report the identification of U1 snRNP-associated proteins in Arabidopsis.  
 316 Using an RNA-centric approach, we enriched known U1 snRNP core and accessory  
 317 components and identified proteins that may indirectly associate with the U1 snRNP,  
 318 potentially hinting at their role in mRNA splicing. In general, RNA-centric approaches for the  
 319 isolation of RNA-containing protein complexes might be powerful tools for the detection  
 320 mRNPs. For the sake of fairness, one has to admit that the U1 snRNA is a very abundant  
 321 RNA species, which makes RNA IP-MS experiments for such classes of RNA easier than for



322 lower abundant RNA species. But in general, such RNA-centric approaches to find  
323 regulators of RNA processing are attractive, as they do not require generation of  
324 transgenics, but might require optimization. For low abundant RNAs, alternative approaches  
325 which involve RNA labeling might be better alternatives<sup>66-70</sup>.

326 Our *U1-70K* and *U1-C* knockdown lines exhibited much stronger phenotypic  
327 alterations compared to previously reported *U1-A* and *U1-70K* T-DNA insertion lines<sup>20,21</sup>.  
328 One possible explanation is that the analyzed T-DNA mutants are not strong or true knock-  
329 out alleles, especially for *U1-70K*, where two different T-DNA lines with insertions at the 5'  
330 and 3'-ends of the *U1-70K* gene were studied<sup>20,21</sup>. Another explanation for the lack of  
331 drastically altered phenotypes in U1 T-DNA lines might be functional redundancy. U1-A and  
332 U2B'', both of which bind to the U1 and U2 snRNA stem-loop, respectively, recently evolved  
333 from a single ancestral protein and exhibit functional redundancy in metazoans<sup>71,72</sup>. The  
334 sequences of Arabidopsis U1-A and U2B'' proteins are highly similar<sup>73</sup>, which might suggest  
335 some redundancy also in plants. Although U2B'' does not bind U1 snRNA under standard  
336 conditions<sup>20,74</sup>, U1 snRNA might be bound by U2B'' (or other sequence-related U1-A  
337 proteins) in *u1-a* mutants in vivo, thus explaining the lack of drastically altered phenotypes in  
338 *u1-a* mutants compared to our *U1-70K* and *U1-C* knockdown lines. Antisense morpholino  
339 oligonucleotides are a powerful tool to study U1 snRNP functions in human cell culture  
340 systems, but similar tools are currently unavailable in the plant research community<sup>27</sup>.  
341 Reduction of *U1-70K* and *U1-C* expression in Arabidopsis by amiRNAs resulted in  
342 overlapping phenotypic, RNA expression, splicing, and cleavage/polyadenylation defects.  
343 Thus, these amiRNA lines (and further developments using tissue-specific or inducible  
344 promoters) become important tools for the future analysis of U1 functions in plants.

345 The availability of U1-IP-MS data and U1 knockdown lines enabled us to study the  
346 function of the Arabidopsis U1 snRNP in mRNA 3'-end processing. Similar to the metazoan  
347 U1 snRNP, the Arabidopsis U1 snRNP interacts with RNA 3'-end processing complexes and  
348 possesses telescripting function to suppress intronic PAS sites. Moreover, the Arabidopsis  
349 U1 snRNP also promotes the usage of proximal PAS sites in 3'-UTRs, which might be linked  
350 to a general RNAPII termination defect upon U1 knockdown. The mechanism behind how  
351 the Arabidopsis U1 snRNP suppresses intronic PAS while promoting proximal PAS in  
352 3'-UTRs remains to be investigated. An RNAi screen in mouse cells shows that the  
353 knockdown of CPAFs results in contrasting effects on mRNA length, suggesting that some  
354 CPAFs promote while others inhibit certain PAS sites<sup>75</sup>. For example, the knockdown of  
355 AtCFI68 results in shorter mRNAs, while the knockdown of FIP1 increases mRNA length<sup>75</sup>.  
356 In line with this, CFI68 has been shown as an activator of premature polyadenylation and it  
357 was proposed that the U1 snRNP might prevent CFI68 association to proximal PAS<sup>36</sup>.  
358 Interestingly, we found that AtCFI68 and FIP1 associate with the Arabidopsis U1 snRNP,

359 which might suggest that several U1-CPAF complexes with distinct activities exist in  
360 Arabidopsis. Depending on the composition of these complexes and the position along the  
361 gene, U1 snRNP suppresses CPAF activities, while a U1 snRNP with distinct protein partner  
362 enhances cleavage and polyadenylation at proximal sites in 3'UTRs (Figure 4D).  
363 Identification of cis and trans factors responsible for the distinct modes of U1 action will be  
364 an interesting subject for future studies.

365 Alternative polyadenylation plays a pivotal role in gene expression control in plants  
366 and several factors involved in APA have been described in plants<sup>52,53,76-80</sup>. The U1 snRNP  
367 has not yet been linked to APA in plants and while the changes we analyzed occur only in  
368 an artificial condition (U1 knockdown), we think that the U1 telescripting function and U1  
369 3'UTR length regulation are also important layers of adaptive gene regulation in plants. Early  
370 reports suggested that cleavage and polyadenylation within introns is rare<sup>81,82</sup>, but usage of  
371 intronic PAS to regulate gene expression in Arabidopsis has been described in several  
372 instances; such alternative polyadenylation might lead to non-functional RNAs to control the  
373 abundance of the canonical mRNA or to generation alternative mRNAs encoding alternative  
374 protein<sup>83-86</sup>. Modulation of U1 snRNP telescripting function to regulate APA might therefore  
375 add an important layer for gene expression in Arabidopsis and in crops, too<sup>87,88</sup>. Whether  
376 certain condition globally affects telescripting in plants, such as in humans under heat-shock  
377 conditions, remains to be elucidated<sup>34</sup>.

378

## 379 MATERIALS AND METHODS

380

### 381 Plant material and growth conditions

382 All *Arabidopsis thaliana* lines used in this study were in the Columbia (Col-0) background.  
383 Plants on soil were grown under a long-day cycle (16 hours light/8 hours night) at 22°C/20°C  
384 conditions. For seedlings grown on plates, seeds were first surface sterilized with 80%  
385 ethanol containing 0.05% Triton X-100. Afterward, seeds were grown on half-strength  
386 Murashige Skoog (MS) plates containing 0.8% phytoagar and grown for 7 days (for RNA-  
387 sequencing) or 14 days (for ChIP or ChIRP) under continuous light conditions at 22°C.

388 For the construction of artificial microRNA against *U1-70K* and *U1-C*,  
389 oligonucleotides (Supplemental Table 3) were derived from ([http://wmd3.weigelworld.org/cgi-  
390 bin/webapp.cgi?page=Home;project=stdwmd](http://wmd3.weigelworld.org/cgi-bin/webapp.cgi?page=Home;project=stdwmd)). PCR products were amplified using Phusion  
391 High Fidelity DNA Polymerase (NEB) and pRS300 plasmid containing the miR319a  
392 precursor served as the template<sup>89,90</sup>. The engineered artificial microRNAs were subcloned  
393 into pCR8/GW/TOPO (Thermo Scientific) and transferred into a Gateway Cloning system  
394 pGWB602<sup>91</sup> using Gateway LR Clonase II Enzyme Mix (Thermo Scientific). The resulting

395 plasmids were transformed into the *Agrobacterium* strain GV3101 and introduced into  
396 *Arabidopsis* Col-0 plants through the floral dipping method<sup>92</sup>.

397

### 398 **RNA extractions, RT-qPCR and Illumina library preparation**

399 Total RNA was extracted using Direct-zol<sup>TM</sup> RNA Miniprep (Zymo Research) according to  
400 the manufacturer's instructions. For the validation of the alternative splicing defects, 1-2 µg  
401 of RNA was treated with DNase I (ThermoFisher Scientific), and the cDNA was prepared  
402 using the RevertAid First Strand cDNA Synthesis kit (ThermoFisher Scientific) using 100 µM  
403 oligodT. RT-PCR was performed using the Dreamtaq DNA Polymerase (ThermoFisher  
404 Scientific) and run on 2% agarose gel. For the RT-qPCR experiments, we used Maxima  
405 SYBR Green (ThermoFischer Scientific) in Bio-Rad CFX-384 and calculated the relative  
406 expression using the  $2^{-\Delta\Delta CT}$  with PP2A as the control. All the oligonucleotides are listed in  
407 Supplementary Table 3. For the RNA-sequencing experiments, 5 µg of RNA was treated  
408 with DNase I (ThermoFisher Scientific) and cleaned up using the RNA Clean and  
409 Concentrator<sup>TM</sup>-5 (Zymo Research). PolyA mRNA was isolated using the NEBNext Poly(A)  
410 mRNA Magnetic Isolation Module (New England Biolabs). Afterward, the cDNA libraries  
411 were prepared using the NEBNext Ultra Directional RNA Library Prep Kit for Illumina (New  
412 England Biolabs). The resulting libraries were measured using the Qubit dsDNA High  
413 Sensitivity Assay Kit (Thermo Fisher Scientific) and size distribution was determined using  
414 the Agilent High Sensitivity DNA Kit (Agilent). Libraries were pooled together for paired-end  
415 sequencing on an Illumina Hi-Seq 3000. For 3'-end RNA sequencing, DNase-treated RNA  
416 was sent to Lexogen GmbH (Vienna, Austria) for library construction using the Quantseq 3'  
417 mRNA-seq Library Prep kit REV.

418

### 419 **Differential gene expression and alternative splicing analysis**

420 Paired end reads were trimmed using Trim Galore (version 0.6.7)  
421 (<https://github.com/FelixKrueger/TrimGalore>) with Cutadapt<sup>93</sup> (version 3.4) and filtered by  
422 aligning all reads to the tRNA and rRNA transcripts of *Arabidopsis thaliana*. For that  
423 purpose, the latest transcriptome (ATRTD3) was queried for tRNA and rRNA transcripts  
424 using the functional descriptions provided by Araport11<sup>94</sup>. The reads were then aligned to  
425 the tRNA/rRNA reference using HISAT2 (version 2.2.1)<sup>95</sup>. Reads that did not align to tRNA  
426 and rRNA were used for downstream analysis. Quality control was performed before and  
427 after trimming and filtering with fastQC (version 0.11.9)  
428 (<https://www.bioinformatics.babraham.ac.uk/projects/fastqc/>) and multiQC (version 1.13)<sup>96</sup>.  
429 Filtered and trimmed reads were quantified at transcript level with salmon (version 1.9.0)  
430 using ATRTD3<sup>94,97</sup>. Quantified transcript level reads were summarized to gene level and  
431 imported to R (version 4.2.2) using tximport (version 1.26.1)<sup>98</sup>. Differentially expressed

432 genes ( $p < 0.05$ ) were called using the R package DESeq2 (version 1.38.3)<sup>99</sup>. Additional  
433 packages used for the analysis and visualization are ggrepel (version 0.9.3,  
434 <https://github.com/slowkow/ggrepel>), ggplot2 (version 3.4.2)<sup>100</sup> and dplyr (version 1.1.2)  
435 (<https://github.com/tidyverse/dplyr>). For a full session report and additional quality control  
436 plots refer to the jupyter notebook provided within the Github repository  
437 [https://github.com/WeberJoachim/Mangilet\\_et\\_al\\_2023](https://github.com/WeberJoachim/Mangilet_et_al_2023). For the analysis of differentially  
438 spliced transcripts the filtered and trimmed reads were mapped to the Arabidopsis genome  
439 (version TAIR10)<sup>101</sup> with HISAT2 (version 2.2.1). The resulting alignments were converted to  
440 BAM format, sorted and indexed using SAMtools (version 1.9)<sup>102</sup>. Differentially spliced  
441 transcripts were identified from indexed and sorted BAM files with rMATS (version 4.1.2). An  
442 additional software used in this analysis is seqkit (version 2.3.1)<sup>103</sup>. All workflows and  
443 specific parameters used in this analysis are available under  
444 [https://github.com/WeberJoachim/Mangilet\\_et\\_al\\_2023](https://github.com/WeberJoachim/Mangilet_et_al_2023). Pipelines were implemented using  
445 Nextflow<sup>104</sup>, programs were used as Singularity containers<sup>105</sup>. Singularity image files were  
446 pulled from Galaxy<sup>106</sup>.

447

### 448 **3'-end mRNA sequencing analysis**

449 3'-end mRNA sequencing reads were analyzed using the apa toolkit within the expressRNA  
450 framework<sup>61</sup>. For visualization, the reads were trimmed using Trim Galore and filtered by  
451 aligning to a rRNA / tRNA reference using HISAT2. The filtered and trimmed reads were  
452 aligned to TAIR10 using HISAT2, resulting alignment files were converted to BAM format,  
453 sorted and indexed using SAMtools. BAM files were then converted to BedGraph using  
454 deepTools and merged using UCSC WiggleTools (version 1.2.8)<sup>107</sup>. Merged BedGraph files  
455 were further used for visualization.

456

### 457 **Nanopore direct RNA-sequencing**

458 Total RNA was isolated using RNAzol® RT (Sigma-Aldrich, R4533) from three biological  
459 replicates of WT, *amiR-u1-70k* and *amiR-u1-c* seedlings. according to the manufactures  
460 instructions and quantified using NanoDrop® ND-1000 Spectrophotometer. We isolated  
461 polyA RNA using the Ambion™ Poly(A)Purist™ MAG K kit (Thermo Fisher Scientific,  
462 AM1922) according to manufactures instructions. Quantity and quality of total and polyA-  
463 selected RNA were determined using the Qubit RNA HS assay and 2100 Agilent  
464 Bioanalyzer using the Agilent RNA 6000 Pico kit. For direct RNA-seq library preparation, the  
465 SQK-RNA002 kit (Oxford Nanopore Technologies) was used together with NEBNext® Quick  
466 Ligation Reaction Buffer (NEB B6058), T4 DNA Ligase 2M U/ml (NEB M0202), SuperScript  
467 III Reverse Transcriptase (Thermo Fisher Scientific, 18080044) and Agencourt RNAClean  
468 XP beads according to manufactures instructions. Qubit 1x dsDNA HS assay was used to

469 quantitate 1  $\mu$ l of the library, and the remainder was loaded on a primed PromethION flow  
470 cell (FLO-PRO002 R9) and run on a PromethION. Fast5 files were basecalled using Cuda  
471 (version 12.1.0) and Guppy (Version 6.2.1), with the statistical model  
472 "rna\_r9.4.1\_70bps\_hac\_prom.cfg". Initial quality analysis was performed using FastQC and  
473 summarized with multiQC. Basecalled reads were aligned against the genome (TAIR10)  
474 using minimap2 (version 2.24)<sup>108</sup>. SAM files were converted to BAM, sorted and indexed  
475 using SAMtools (version 1.17). Because of variation of library sizes ranging from 0.1 to 2.6  
476 million reads within replicates, the alignments from all three biological replicates were  
477 merged using SAMtools to perform qualitative analysis depicted in Figure 5E and 6B.

478

### 479 **Comprehensive Identification of RNA-binding proteins (ChIRP)**

480 The original protocol was adapted from <sup>37</sup> with some minor modifications. Nine grams of 14-  
481 day-old Arabidopsis Col-0 seedlings were harvested and crosslinked with 3% formaldehyde  
482 for 15 minutes under a vacuum chamber at 85 kPa. Vacuum infiltration was repeated once  
483 more to ensure proper cross-linking. The cross-linking reaction was then quenched by  
484 adding 4 mL of 1.25 M Glycine for 5 minutes in the vacuum. Cross-linked seedlings were  
485 then washed three times with distilled water, dried on blotting paper, and stored at -80°C. To  
486 isolate the nuclei, frozen materials were grounded with liquid Nitrogen and resuspended in  
487 HONDA buffer (400 mM Sucrose, 1.25% Ficoll, 2.5% Dextran, 25 mM HEPES-KOH pH 7.4,  
488 10 mM MgCl<sub>2</sub>, 0.5% Triton X-100, 1 mM PMSF, cOmplete Protease Inhibitor Cocktail EDTA-  
489 free [Roche], and 10 mM DTT). The homogenate was passed through two layers of  
490 Miracloth and was centrifuged at 1500 g for 15 minutes at 4°C. The pellet was then carefully  
491 washed five times with HONDA buffer until most of the green material was removed at  
492 1500g for 5 minutes at 4°C centrifuge. Then washed again with M3 buffer (10 mM Sodium  
493 phosphate pH 7.0, 100 mM NaCl, 10 mM DTT, and 1X Protein Inhibitor). Finally, the pellet  
494 was resuspended in sonic buffer (10 mM Sodium Phosphate pH7.0, 100 mM Sodium  
495 chloride, 0.5% Sarkosyl, 10 mM EDTA, 1X Complete cocktail, 1 mM PEFA). Chromatin  
496 shearing was done using the Covaris S220 under the following conditions: 20% Duty Cycle,  
497 140 Peak intensity, 200 Cycles per burst, and a total of 3 minutes of cycle time. The samples  
498 were centrifuged at 13000 rpm for 5 minutes at 4°C. The supernatant was then transferred  
499 into a DNA LoBind tube (Eppendorf), flash frozen in liquid nitrogen and stored at -80°C.  
500 Chromatin was thawed at room temperature together with the probes for U1 snRNA and  
501 control (Supplemental Table 3). Fifty microliters of chromatin served as the protein input.  
502 Two ml of hybridization buffer (750 mM NaCl, 50 mM Tris-HCl pH 7.0, 1mM EDTA, 1% SDS,  
503 15% Formamide, 1x Protease Inhibitor, 1x PMSF, 1x Riboblock (40 U/ $\mu$ l) [ThermoFisher  
504 Scientific], Plant Specific Protease Inhibitor [Sigma]). One microliter of the 100  $\mu$ M probe  
505 was added and allowed to gently rotate end-to-end at 37°C for 4 hours in a hybridization



506 oven. With 2 hours remaining for the hybridization, 100  $\mu$ l of Dynabeads MyOne Streptavidin  
507 C1 (ThermoFisher Scientific) were prepared by removing the storage buffer and washing  
508 them three times with 1 mL of unsupplemented nuclear lysis (50 mM Tris-HCl, 10 mM EDTA,  
509 1% SDS) buffer using a magnetic stand.. When the hybridization was finished, 100  $\mu$ l of the  
510 washed beads were added to the mixture and incubated for an additional 30 minutes. During  
511 this incubation, the wash buffer (2x SSC, 0.5 % SDS) was prepared and pre-warmed at  
512 37°C before use. When the bead binding is completed, the mixture was briefly centrifuged  
513 and the beads were separated from the mixture for two minutes in a magnetic stand. One  
514 microliter of the Wash Buffer was used to wash the beads and gently rotated again at 37°C  
515 for 5 minutes in a hybridization oven. The washing step is repeated four times, for a total of  
516 five washes. For the last wash, all the buffer was removed. For the preparation for the mass  
517 spectrometry analysis, the beads were washed three times in 20 mM sodium bicarbonate  
518 buffer.

519

#### 520 **Protein on beads digestion**

521 All steps for protein digestion were performed at room temperature as described before <sup>109</sup>.  
522 Briefly, beads were resuspended in denaturation buffer (6 M urea, 2 M thiourea, 10 mM Tris  
523 buffer, pH 8.0), and proteins were reduced and subsequently alkylated by incubation in 1  
524 mM dithiothreitol (DTT) for one hour followed by addition of 5.5mM iodacetamide (IAA) for  
525 another hour in the dark. Proteins were pre-digested with LysC for three hours at pH 8.  
526 Beads were then diluted in 4 volumes 20 mM ammonium bicarbonate buffer and proteins  
527 digested with 2  $\mu$ g trypsin per estimated 100  $\mu$ g protein at pH 8 overnight. Acidified peptides  
528 were desalted with C18 stage tips as described previously <sup>110</sup>.

529

#### 530 **Mass spectrometry**

531 LC-MS/MS analyses of eluted samples were performed on an Easy nano-LC (Thermo  
532 Scientific) coupled to an LTQ Orbitrap XL mass spectrometer (Thermo Scientific) as  
533 described elsewhere <sup>111</sup>. The peptide mixtures were injected onto the column in HPLC solvent  
534 A (0.1% formic acid) at a flow rate of 500 nl/min and subsequently eluted with a 49 minute  
535 segmented gradient of 10–33-50-90 % of HPLC solvent B (80% acetonitrile in 0.1% formic  
536 acid) at a flow rate of 200 nl/min. The 15 most intense precursor ions were sequentially  
537 fragmented in each scan cycle using collision-induced dissociation (CID). In all  
538 measurements, sequenced precursor masses were excluded from further selection for 30 s.  
539 The target values were 5000 charges for MS/MS fragmentation and 10<sup>6</sup> charges for the MS  
540 scan. Due to high contamination of polymers in the samples it was decided to further purify  
541 the samples via PHOENIX Peptide Clean-up Kit (PreOmics) according to user manual. Final  
542 measurements were performed after PHOENIX Kit purification as described above.



543

#### 544 **Mass spectrometry data processing**

545 The MS data of all runs together were processed with MaxQuant software suite v.1.5.2.8<sup>112</sup>.  
546 A database search was performed using the Andromeda search engine which, is integrated  
547 into MaxQuant<sup>113</sup>. MS/MS spectra were searched against a target-decoy Uniprot database  
548 from *A. thaliana* downloaded 2019-02-13 consisting of 91,457 protein entries from *A.*  
549 *thaliana* and 245 commonly observed contaminants. In a database search, full specificity  
550 was required for trypsin. Up to two missed cleavages were allowed. Carbamidomethylation  
551 of cysteine was set as a fixed modification, whereas oxidation of methionine and acetylation  
552 of protein N-terminus were set as variable modifications. Initial mass tolerance was set to 4.5  
553 parts per million (ppm) for precursor ions and 0.5 daltons (Da) for fragment ions. Peptide,  
554 protein, and modification site identifications were reported at a false discovery rate (FDR) of  
555 0.01, estimated by the target/decoy approach<sup>114</sup>. Match between runs was enabled for  
556 samples within one group so for U1, U2, and control samples separately. iBAQ and LFQ  
557 settings were enabled. MaxQuant data were analyzed using msVolcano for the detection of  
558 significantly enriched proteins using the following parameters<sup>115</sup>: FDR = 0.04; curvature =  
559 0.75; min. fold change = 0 or FDR = 0.05; curvature = 2.5; min. fold change = 0 for U1-IP-  
560 MS and U2-IP-MS, respectively.

561

#### 562 **Co-Immunoprecipitation**

563 For the expression of HA-, RFP- or YFP-tagged proteins, the coding sequence of each  
564 protein was PCR-amplified and subcloned into pCR<sup>TM</sup>8/GW/TOPO<sup>®</sup> (Invitrogen). To  
565 generate binary plasmids, the entry vectors were recombined using  
566 Gateway<sup>TM</sup> LR Clonase<sup>TM</sup> II (Thermo Scientific) with either pGWB642 for the expression of  
567 YFP-tagged fusion proteins, pGWB515 for the expression of HA-tagged fusion proteins or  
568 pGWB654 for the expression of RFP fusion proteins<sup>91</sup>. Binary plasmids were transformed  
569 into *Agrobacterium tumefaciens* (strain GV3101). Proteins were expressed by  
570 *Agrobacterium*-mediated transient expression in *Nicotiana benthamiana*. For this,  
571 *Agrobacterium* was grown overnight at 28°C and cultures were pelleted by centrifugation.  
572 The pellet were resuspended in infiltration media (10 mM MgCl<sub>2</sub>, 10 mM MES-KOH, pH 5.6  
573 and 100 μM acetosyringone) and the OD<sub>600</sub> was adjusted to 0.5. After incubated for three  
574 hours at 22°C with light agitation. one or two leaves per *N. benthamiana* plant were  
575 infiltrated with infiltration mixture. After three days, transformed tobacco leaves were snap-  
576 frozen, grounded to a fine powder and resuspended in the protein lysis buffer (50 mM Tris  
577 HCl pH7.4, 150 mM NaCl, 10% Glycerol, 0.5 % TritonX-100, 0.5 % Nonidet<sup>TM</sup> P 40  
578 Substitute, 1 mM PMSF, 2 mM DTT, 50 μM MG132, Plant specific protease inhibitor (Sigma-  
579 Aldrich P9599), and cOmplete Protease Inhibitor Cocktail EDTA-free (Roche). After

580 centrifugation at 13000 x g for 10 minutes at 4°C. the supernatant was used for  
581 immunoprecipitation. For each immunoprecipitation, 20 µl of RFP-trap beads (Chromotek)  
582 were equilibrated by washing them three times with wash buffer (50 mM Tris HCl pH 7.5,  
583 150 mM NaCl, 10 % Glycerol). The protein samples were added to the equilibrated beads  
584 and incubated for 1 hour on a rotating wheel at 4°C. The input samples were incubated  
585 together with the IP samples. After incubation, the beads were washed three times with  
586 wash buffer before incubation in Laemmli buffer at 80°C for 10 minutes. The isolated  
587 proteins were resolved by SDS-PAGE, blotted to nitrocellulose membranes and incubated  
588 with antibodies specific for GFP (Chromotek, 3h9), RFP (Chromotek, 6g6) or HA (Agrisera;  
589 AS12 2200). An HRP-conjugated secondary antibody (rat AS10 1115, rabbit AS09 602 and  
590 mouse AS10 1115, all Agrisera) and the Western Bright Chemiluminescence Substrate  
591 Sirius (Biozym) was used for protein detection.

592

### 593 **Chromatin Immunoprecipitation (ChIP)**

594 The method is adapted from <sup>116</sup>. Three grams of 14-day old Arabidopsis seedlings were  
595 collected and fixed with 40 mL 1% formaldehyde in MQ buffer (10 mM Sodium phosphate  
596 pH7.0, 50 mM Sodium chloride) for 10 minutes under a vacuum chamber at 85 kPa. Vacuum  
597 infiltration was repeated once more to ensure proper cross-linking. The cross-linking reaction  
598 was then quenched by adding 4 mL of 1.25M Glycine for 5 minutes in the vacuum. Cross-  
599 linked seedlings were then washed three times with distilled water, dried on paper, and  
600 stored at -80C. To isolate the nuclei, frozen materials were then grounded with liquid  
601 Nitrogen and resuspend in HONDA buffer (400 mM Sucrose, 1.25% Ficoll, 2.5% Dextran, 25  
602 mM HEPES-KOH pH7.4, 10 mM MgCl<sub>2</sub>, 0.5% Triton X-100, 1 mM PMSF, Proteinase  
603 Inhibitor cocktail, and 10 mM DTT). The resuspended plant materials were filtered with 2  
604 layers of Miracloth and transferred into a new 50 mL tube. The homogenate was centrifuged  
605 at 1500g for 15 minutes at 4C. The pellet was then carefully washed five times with HONDA  
606 buffer until most of the green material was removed at 1500 g for 5 minutes at 4C centrifuge.  
607 Then washed again with M3 buffer (10 mM Sodium phosphate pH7.0, 100mM Sodium  
608 chloride, 10 mM DTT and 1X Protein Inhibitor). Then the pellet was resuspended in Sonic  
609 buffer (10 mM Sodium Phosphate pH7.0, 100 mM Sodium chloride, 0.5% Sarkosyl, 10 mM  
610 EDTA, 1X Complete cocktail, 1 mM PEFA). Chromatin shearing was done using the Covaris  
611 S220 under the following conditions: 20% Duty Cycle, 140 Peak intensity, 200 Cycles per  
612 burst, and a total of 3 minutes of cycle time. The samples were then centrifuged at  
613 13000rpm for 5 minutes at 4C. The supernatant was then transferred into a DNA lobind tube.

614 For the immunoprecipitation experiment, 700 µl of the solubilized chromatin was  
615 used, and 140 µl for the input. And then IP buffer (50 mM HEPES pH7.4, 150 mM KCl, 5 mM  
616 MgCl<sub>2</sub>, 0.01 mM ZnSO<sub>4</sub>, 1% Triton X-100, 0.05% SDS) was added to the IP and input.

617 RNAPII CTD (Abcam, ab817) were added to the IP and incubated overnight in a rotating  
618 wheel overnight at 4°C. The following day, 40 µl of Protein A/G agarose beads (Santa Cruz  
619 Biotechnology, Cat. No. sc2001) was added to the IP and incubated for 6 hours in a rotating  
620 wheel at 4°C. After the incubation, beads were pelleted by centrifugation and washed five  
621 times with 1mL of IP buffer on a rotating wheel with centrifugation in each wash. Associated  
622 DNA with the proteins was then eluted with 120 µl of cold acidic glycine buffer pH 2.8 (100  
623 mM Glycine, 500 mM NaCl, 0.05 % Tween-20, HCl). The supernatant was transferred to a  
624 tube containing 150 µl of Tris pH 9.0. This elution with glycine was repeated twice and each  
625 elution was transferred into the same tube. RNase A was added and incubated at 37°C for  
626 15 minutes. To denature the proteins, 1.5 µl of Proteinase K was added and incubated  
627 overnight at 37C. A second aliquot of Proteinase K was added to the samples and incubated  
628 at 65C for 6 hours to reverse the crosslinking. DNA was then purified using MinElute  
629 (Qiagen) according to the manufacturer's instructions with minor modifications. The IP  
630 samples were then divided into 2 and 3 volumes of ERC buffer was added. The pH was  
631 adjusted using 3 M sodium acetate. The mixture was then added to the spin column and  
632 washed with the PE buffer and eluted with 35 µl EB buffer. ChIP DNA libraries were  
633 prepared using the NEBNext Ultra II DNA Library Prep Kit for Illumina (New England  
634 Biolabs) according to the manufacturer's instructions. The libraries were prepared without  
635 size selection. Multiplexing was done using the NEBNext Multiplex Oligos for Illumina (Set 1,  
636 2,3,4). The concentration of the libraries was determined using the Qubit™ dsDNA HS  
637 Assay Kit (Thermo Fisher Scientific) and size distribution was measured using the Agilent  
638 High Sensitivity DNA Kit (Agilent). Libraries were pooled together and performed paired-end  
639 sequencing on an Illumina Hi-Seq 2000.

640

#### 641 **ChIP-seq analysis**

642 Paired end reads from ChIP-seq (Chromatin Immuno Precipitation DNA-Sequencing) were  
643 trimmed using Trim Galore. Trimmed reads were then aligned to the Arabidopsis genome  
644 (version TAIR10)<sup>101</sup> with HISAT2 using the "--no-splice-alignment" option. Mapped reads  
645 were further analyzed with the MACS2 (version 2.9.1.)<sup>117</sup>. Therefore, the IGG control pileups  
646 was subtracted from the treatment and input control pileups. The resulting pileups  
647 (BedGraphs) were then compared using fold enrichment between IGG corrected treatment  
648 and input. Quality control of pileups was performed by converting BedGraphs to bigWig files  
649 and subsequent multibigwigsummary and plotCorrelation using deepTools (version 3.5.2)<sup>118</sup>.  
650 Here it was discovered that replicate 1 of *amiR-u1-c* behaves differently from all other  
651 samples and thus was discarded in the downstream analysis. Meta plots were assembled by  
652 merging the bigWig files and then plotting them using deepTools plotProfile.

653

654 **Data visualization**

655 For visualizing all sequencing reads, we created a fork of the long-read visualization  
656 framework from FLEP-seq<sup>119</sup> and added the functionality to plot BedGraph files. The code  
657 can be found in the Jupyter notebook within the Github repo of this study or as standalone  
658 repository under [https://github.com/WeberJoachim/Viz\\_bdg\\_and\\_nanopore\\_bam](https://github.com/WeberJoachim/Viz_bdg_and_nanopore_bam).

659

660 **Data availability**

661 All raw data sets, along with metadata files, are publicly available at ENA or PRIDE under  
662 the accession numbers PRJEB65251 (for RNA and DNA sequencing) or PXD045484 (for  
663 proteomic analyses). All analysis pipelines and parameters applied are accessible at  
664 [https://github.com/WeberJoachim/Mangilet\\_et\\_al\\_2023](https://github.com/WeberJoachim/Mangilet_et_al_2023).

665

666 **ACKNOWLEDGEMENTS**

667 We are grateful to Udo Gowik for his help in the initial phase of this project. We greatly  
668 appreciate the valuable comments and critical reading of the manuscript by Cornelius  
669 Schmidtke. This work was funded by the German Science Foundation (DFG), grant  
670 LA2633-4/2, to S.L..

671

672 **AUTHOR CONTRIBUTIONS**

673 A.F.M and S.L. designed the study. A.F.M, S.Sc., I.D.-B. performed experiments. J.W., G.R.  
674 A.F.M, I.D.-B., B.M. and S.L. analyzed the data, S.St. and T.S. contributed analytical tools,  
675 A.F.M and S.L. wrote the article with contributions from all authors.

676

677 **CONFLICT OF INTEREST**

678 All authors declare no conflict of interests.

679

680 **FIGURE LEGENDS**

681

682 **Figure 1: Identification of Arabidopsis U1 snRNP-associated proteins by U1-IP-MS**

683 **A:** Schematic representation of the U1 snRNA immunoprecipitation followed by mass  
684 spectrometry (U1-IP-MS) experiment.

685 **B, C:** Analysis of U1 snRNA (B) and U2 snRNA (C) associated proteins identified by IP-MS.  
686 Volcano plot of three biological replicates showing significantly enriched proteins  
687 immunoprecipitated with a U1 (B) or U2 (C) antisense oligonucleotide compared to a *lacZ*  
688 oligonucleotide (p-value < 0.01). Known U1-specific proteins are highlighted in red (B).

689 **D:** Venn diagram depicting the overlap between significantly enriched proteins in U1-IP-MS  
690 and U2-IP-MS experiments.

691 **E, F:** Abundance of specific proteins in U1-IP-MS experiments. The three red and grey dots  
692 represent intensity-based absolute quantification (IBAQ) values of three biological replicates  
693 using the U1 or the lacZ antisense oligonucleotide, respectively. Proteins known to be part of  
694 the U1 snRNP (E) and selected proteins that function in splicing and RNA processing (F) are  
695 shown.

696

697 **Figure 2: Knock-down of two U1 snRNP core components, U1-70K and U1-C,**  
698 **drastically affects plant development and gene expression**

699 **A:** Gene models of *U1-70K* and *U1-C* and regions used for the design of artificial miRNAs  
700 (amiRNAs). The blue rectangle indicates the position of PCR primers used for qPCR in  
701 Figure 2B.

702 **B, C:** qRT-PCR analysis of *U1-70K* and *U1-C* levels in seven-day-old WT, *amiR-u1-70k* and  
703 *amiR-u1-c* seedlings. The bars indicate the average relative expression in three biological  
704 replicates, dots represent indicate the three independent measurements. The letters indicate  
705 the statistical significance tested using ANOVA followed by Tukey's honestly significant  
706 difference test (Tukey's HSD) for pairwise comparison with a significance threshold of  $p <$   
707 0.05.

708 **D, E:** Gross phenotypes of WT, *amiR-u1-70k*, and *amiR-u1-c* plants grown for 21 days (D) or  
709 56 days (E) under long day (16h light/8h darkness) conditions.

710 **F:** Leaf length of WT, *amiR-u1-70k*, and *amiR-u1-c* plants, measured after 21 days. The bars  
711 indicate the average leaf length, dots represent indicate individual leaf length  
712 measurements. The letters indicate the statistical significance tested using ANOVA followed  
713 by Tukey's honestly significant difference test (Tukey's HSD) for pairwise comparison with a  
714 significance threshold of  $p <$  0.05.

715 **G:** Venn diagrams depicting the overlap of differentially expressed genes in *amiR-u1-70k*  
716 and *amiR-u1-c* compared to WT. Expression was determined by RNA-seq and differentially  
717 expressed were considered all genes that significantly differed between WT and U1  
718 knockdown line ( $p_{\text{adjusted}} <$  0.05).

719

720 **Figure 3: Knock-down of U1-70K or U1-C causes overlapping splicing defects**

721 **A, B:** Changes in the splicing pattern were calculated based on RNA-seq data from WT,  
722 *amiR-u1-70k*, and *amiR-u1-c* plants using rMATS. Splicing changes were subcategorized  
723 into exon skipping, alternative 5'splice site (alt. 5'SS), alternative 3'splice site (alt. 3'SS),  
724 mutually exclusive exons (mut. Excl. exon), and intron retention. A schematic representation  
725 of the different splicing changes is shown in A.

726 **C:** RT-PCR analysis of selected alternative splicing events detected in the RNA-seq data  
727 set. Primers used for amplification were designed to flank the splicing event.

728 **D:** ONT direct RNA-seq reads aligned to the genes that produced alternative spliced RNAs  
729 (C). The coverage plot of one representative replicate of the RNA-seq data set used for  
730 rMATS analysis (A, B) is shown. Pink boxes indicate the alternative splicing events detected  
731 by rMATS.

732

733 **Figure 4: The U1 snRNP associated with components of mRNA cleavage and**  
734 **polyadenylation complexes**

735 **A, D:** Abundance of cleavage and polyadenylation factors (CPAFs) in U1-IP-MS  
736 experiments. The three red and grey dots represent intensity-based absolute quantification  
737 (IBAQ) values of three biological replicates using the U1 or the lacZ antisense  
738 oligonucleotide, respectively.

739 **B, C:** U1-A translationally fused to RFP was coexpressed with an HA-tagged CFSF73-I (B)  
740 or a YFP-tagged FY (C) in *Nicotiana benthamiana* plants for transient protein expression.  
741 RFP alone served as a negative control. Proteins were isolated and immunoprecipitated  
742 using an RFP-affinity matrix. Input and immunoprecipitated fractions (IP) were subjected to  
743 protein blot analysis using RFP, HA, and YFP-specific antibodies. Unprocessed blots are  
744 available in Figure S2.

745

746 **Figure 5: The U1 snRNP regulates alternative polyadenylation in Arabidopsis**

747 **A:** A schematic representation of enhanced and repressed alternative polyadenylation  
748 (APA). In enhanced APA events, the proximal PAS site is preferentially utilized. In repressed  
749 APA events, the distal PAS site is preferentially utilized. Black arrows indicate the proximal  
750 PAS and red arrows indicate the distal PAS.

751 **B, C:** Polyadenylation sites were detected by 3'-end sequencing of RNAs (3'-seq)  
752 experiments using RNA isolated from seven-day-old WT, *amiR-u1-70k*, and *amiR-u1-c*  
753 seedlings. Venn diagrams depict the overlap of enhanced (B) or repressed (C) APA sites in  
754 *amiR-u1-70k* and *amiR-u1-c* when compared to WT.

755 **D:** A schematic representation of three different types of APA, same-exon APA, composite-  
756 exon APA, and skipped exon APA.

757 **E:** Number of different APA events detected in both *amiR-u1-70k* and *amiR-u1-c* plants,  
758 when compared to WT. Same-exon APA, composite-exon APA, and skipped-exon APA  
759 events were further divided into enhanced and repressed events.

760 **F:** Two examples of composite-exon APA events, that are repressed in *amiR-u1-70k* and  
761 *amiR-u1-c* plants. The figure depicts the gene models and the corresponding of coverage  
762 plots for 3'-seq, RNA-seq, direct RNA-seq, and polymerase II association (RNAPII ChIP).



763 **G:** Two examples of same-exon APA events are enhanced in *amiR-u1-70k* and *amiR-u1-c*  
764 plants. The figure depicts the gene models and the corresponding coverage plots for 3'-  
765 seq, RNA-seq, direct RNA-seq, and polymerase II association (RNAPII ChIP).

766

767 **Figure 6. The U1 snRNP affects the distribution of RNA polymerase II at the 3'-end of**  
768 **genes**

769 **A:** Meta plot analysis of RNAPII binding in WT, *amiR-u1-70k*, and *amiR-u1-c* plants to all  
770 genes that utilize more distal polyA in 3'UTRs in *amiR-u1-70k* and *amiR-u1-c* plants (same-  
771 exon APA events, that are enhanced in *amiR-u1-70k* and *amiR-u1-c* plants, see Figure 5F  
772 for individual examples).

773 **B:** Two examples of genes that exhibit a shift of RNAPII accumulation at the 3'-end, but the  
774 mRNA of which are not subjected to APA. Along with the polymerase II association (RNAPII  
775 ChIP) at each locus, coverage plots for 3'-seq, RNA-seq, and direct RNA-seq polymerase II  
776 are shown.

777 **C:** Meta-plot analysis of RNAPII binding to all genes in WT, *amiR-u1-70k*, and *amiR-u1-c*  
778 plants.

779 **D:** Proposed model for the function of the U1 snRNP in RNA 3' processing. The U1 snRNP  
780 associates with cleavage and polyadenylation factors (CPAFs), including CPSF77-I, FY,  
781 CFI68, and FIP1. These interactions prevent premature intronic polyadenylation or ensure  
782 the usage of proximal polyadenylation sites in the last exons. In the absence of U1 snRNP  
783 function, intronic polyadenylation occurs, and more distal polyadenylation sites are utilized in  
784 the last exons.

785

## 786 SUPPLEMENTARY MATERIAL

787

788 **Figure S1:** String analysis reveals known interactions between significantly enriched  
789 proteins in the U1-IP-MS experiment. We applied the following parameter for the String  
790 analysis: interaction sources: Textmining, Experiments, Databases, minimum required  
791 interaction score: high confidence.

792

793 **Figure S2:** Unprocessed blots used for assembly of Figure 4 B and C.

794

795 **Figure S3:** APA events in *amiR-u1-70k* and *amiR-u1-c* plants. Number of different APA  
796 events detected in *amiR-u1-70k* and *amiR-u1-c* plants, when compared to WT. Same-exon  
797 APA, composite-exon APA, and skipped-exon APA events were further divided into  
798 enhanced and repressed events. The overlap of the different APA events is depicted in  
799 Figure 5E.

800

801 **Supplemental Data Set 1:** Proteins identified by mass spectrometry after affinity-purification  
802 using U1-, U2, and lacZ-RNA specific antisense oligonucleotides

803

804 **Supplemental Data Set 2:** Enrichment analysis of biological processes, functions, and  
805 protein domains among U1 snRNA-associated proteins

806

807 **Supplemental Data Set 3:** Differentially expressed genes in *amiR-u1-70k* and *amiR-u1-c*,  
808 respectively, compared to wild-type plants.

809

810 **Supplemental Data Set 4:** Alternatively spliced RNAs in *amiR-u1-70k* and *amiR-u1-c*,  
811 respectively, compared to WT.

812

813 **Supplemental Data Set 5:** Overlap between alternatively spliced and differentially  
814 expressed genes in *amiR-u1-70k* and *amiR-u1-c* plants.

815

816 **Supplemental Data Set 6:** Alternative polyadenylation events detected in WT, *amiR-u1-70k*,  
817 and *amiR-u1-c* plants.

818

819 **Supplemental Table S1:** List of proteins that are significantly enriched in U1-IP-MS

820

821 **Supplemental Table S2:** List of proteins that are significantly enriched in U2-IP-MS

822

823 **Supplemental Table S3:** List of oligonucleotides used in the study

824

## 825 REFERENCES

826

827 1 Will, C. L. & Luhrmann, R. Spliceosome structure and function. *Cold Spring Harb*  
828 *Perspect Biol* **3**, doi:10.1101/cshperspect.a003707 (2011).

829 2 Chen, W. & Moore, M. J. Spliceosomes. *Curr Biol* **25**, R181-183,  
830 doi:10.1016/j.cub.2014.11.059 (2015).

831 3 Kondo, Y., Oubridge, C., van Roon, A. M. & Nagai, K. Crystal structure of human  
832 U1 snRNP, a small nuclear ribonucleoprotein particle, reveals the mechanism of 5'  
833 splice site recognition. *Elife* **4**, doi:10.7554/eLife.04986 (2015).

834 4 Li, Q. Q., Liu, Z., Lu, W. & Liu, M. Interplay between Alternative Splicing and  
835 Alternative Polyadenylation Defines the Expression Outcome of the Plant Unique

- 836 OXIDATIVE TOLERANT-6 Gene. *Sci Rep* **7**, 2052, doi:10.1038/s41598-017-02215-  
837 z (2017).
- 838 5 Plaschka, C., Lin, P. C., Charenton, C. & Nagai, K. Prespliceosome structure  
839 provides insights into spliceosome assembly and regulation. *Nature* **559**, 419-422,  
840 doi:10.1038/s41586-018-0323-8 (2018).
- 841 6 Guiro, J. & O'Reilly, D. Insights into the U1 small nuclear ribonucleoprotein complex  
842 superfamily. *Wiley Interdiscip Rev RNA* **6**, 79-92, doi:10.1002/wrna.1257 (2015).
- 843 7 Lerner, M. R. & Steitz, J. A. Antibodies to small nuclear RNAs complexed with  
844 proteins are produced by patients with systemic lupus erythematosus. *Proc Natl*  
845 *Acad Sci U S A* **76**, 5495-5499, doi:10.1073/pnas.76.11.5495 (1979).
- 846 8 Zhang, D. & Rosbash, M. Identification of eight proteins that cross-link to pre-mRNA  
847 in the yeast commitment complex. *Genes Dev* **13**, 581-592,  
848 doi:10.1101/gad.13.5.581 (1999).
- 849 9 Puig, O., Gottschalk, A., Fabrizio, P. & Seraphin, B. Interaction of the U1 snRNP  
850 with nonconserved intronic sequences affects 5' splice site selection. *Genes Dev*  
851 **13**, 569-580, doi:10.1101/gad.13.5.569 (1999).
- 852 10 Forch, P., Puig, O., Martinez, C., Seraphin, B. & Valcarcel, J. The splicing regulator  
853 TIA-1 interacts with U1-C to promote U1 snRNP recruitment to 5' splice sites. *Embo*  
854 *J* **21**, 6882-6892, doi:10.1093/emboj/cdf668 (2002).
- 855 11 Espinosa, S. *et al.* Human PRPF39 is an alternative splicing factor recruiting U1  
856 snRNP to weak 5' splice sites. *RNA* **29**, 97-110, doi:10.1261/rna.079320.122  
857 (2022).
- 858 12 Wang, L. *et al.* The RNA-binding protein RBP45D of Arabidopsis promotes  
859 transgene silencing and flowering time. *Plant J* **109**, 1397-1415,  
860 doi:10.1111/tpj.15637 (2022).
- 861 13 Chang, P., Hsieh, H. Y. & Tu, S. L. The U1 snRNP component RBP45d regulates  
862 temperature-responsive flowering in Arabidopsis. *Plant Cell* **34**, 834-851,  
863 doi:10.1093/plcell/koab273 (2022).
- 864 14 Stepien, A. *et al.* Chromatin-associated microprocessor assembly is regulated by  
865 the U1 snRNP auxiliary protein PRP40. *Plant Cell* **34**, 4920-4935,  
866 doi:10.1093/plcell/koac278 (2022).
- 867 15 Hernando, C. E. *et al.* A Role for Pre-mRNA-PROCESSING PROTEIN 40C in the  
868 Control of Growth, Development, and Stress Tolerance in Arabidopsis thaliana.  
869 *Front Plant Sci* **10**, 1019, doi:10.3389/fpls.2019.01019 (2019).
- 870 16 Wang, C. *et al.* The Arabidopsis thaliana AT PRP39-1 gene, encoding a  
871 tetratricopeptide repeat protein with similarity to the yeast pre-mRNA processing

- 872 protein PRP39, affects flowering time. *Plant Cell Rep* **26**, 1357-1366,  
873 doi:10.1007/s00299-007-0336-5 (2007).
- 874 17 Kanno, T. *et al.* A Genetic Screen for Pre-mRNA Splicing Mutants of Arabidopsis  
875 thaliana Identifies Putative U1 snRNP Components RBM25 and PRP39a. *Genetics*  
876 **207**, 1347-1359, doi:10.1534/genetics.117.300149 (2017).
- 877 18 Huang, W. *et al.* A genetic screen in Arabidopsis reveals the identical roles for  
878 RBP45d and PRP39a in 5' cryptic splice site selection. *Front Plant Sci* **13**, 1086506,  
879 doi:10.3389/fpls.2022.1086506 (2022).
- 880 19 de Francisco Amorim, M. *et al.* The U1 snRNP Subunit LUC7 Modulates Plant  
881 Development and Stress Responses via Regulation of Alternative Splicing. *Plant*  
882 *Cell* **30**, 2838-2854, doi:10.1105/tpc.18.00244 (2018).
- 883 20 Gu, J. *et al.* Spliceosomal protein U1A is involved in alternative splicing and salt  
884 stress tolerance in Arabidopsis thaliana. *Nucleic Acids Res* **46**, 1777-1792,  
885 doi:10.1093/nar/gkx1229 (2018).
- 886 21 Chen, M. X. *et al.* Phylogenetic comparison of 5' splice site determination in central  
887 spliceosomal proteins of the U1-70K gene family, in response to developmental  
888 cues and stress conditions. *Plant J* **103**, 357-378, doi:10.1111/tpj.14735 (2020).
- 889 22 Golovkin, M. & Reddy, A. S. Expression of U1 small nuclear ribonucleoprotein 70K  
890 antisense transcript using APETALA3 promoter suppresses the development of  
891 sepals and petals. *Plant Physiol* **132**, 1884-1891, doi:10.1104/pp.103.023192  
892 (2003).
- 893 23 Salz, H. K. *et al.* The Drosophila U1-70K protein is required for viability, but its  
894 arginine-rich domain is dispensable. *Genetics* **168**, 2059-2065,  
895 doi:10.1534/genetics.104.032532 (2004).
- 896 24 Rösel, T. D. *et al.* RNA-Seq analysis in mutant zebrafish reveals role of U1C protein  
897 in alternative splicing regulation. *Embo J* **30**, 1965-1976,  
898 doi:10.1038/emboj.2011.106 (2011).
- 899 25 Baserga, S. J. & Steitz, J. A. The Diverse World of Small Ribonucleoproteins. *Cold*  
900 *Spring Harbor Monograph Series* (1993).
- 901 26 Almada, A. E., Wu, X., Kriz, A. J., Burge, C. B. & Sharp, P. A. Promoter  
902 directionality is controlled by U1 snRNP and polyadenylation signals. *Nature* **499**,  
903 360-363, doi:10.1038/nature12349 (2013).
- 904 27 Kaida, D. *et al.* U1 snRNP protects pre-mRNAs from premature cleavage and  
905 polyadenylation. *Nature* **468**, 664-668, doi:10.1038/nature09479 (2010).
- 906 28 Berg, M. G. *et al.* U1 snRNP determines mRNA length and regulates isoform  
907 expression. *Cell* **150**, 53-64, doi:10.1016/j.cell.2012.05.029 (2012).

- 908 29 Mimoso, C. A. & Adelman, K. U1 snRNP increases RNA Pol II elongation rate to  
909 enable synthesis of long genes. *Mol Cell* **83**, 1264-1279 e1210,  
910 doi:10.1016/j.molcel.2023.03.002 (2023).
- 911 30 Yin, Y. *et al.* U1 snRNP regulates chromatin retention of noncoding RNAs. *Nature*  
912 **580**, 147-150, doi:10.1038/s41586-020-2105-3 (2020).
- 913 31 Venters, C. C., Oh, J. M., Di, C., So, B. R. & Dreyfuss, G. U1 snRNP Telescripting:  
914 Suppression of Premature Transcription Termination in Introns as a New Layer of  
915 Gene Regulation. *Cold Spring Harb Perspect Biol* **11**,  
916 doi:10.1101/cshperspect.a032235 (2019).
- 917 32 Oh, J. M. *et al.* U1 snRNP telescripting regulates a size-function-stratified human  
918 genome. *Nat Struct Mol Biol* **24**, 993-999, doi:10.1038/nsmb.3473 (2017).
- 919 33 Waldrop, M. A. *et al.* Intron mutations and early transcription termination in  
920 Duchenne and Becker muscular dystrophy. *Hum Mutat* **43**, 511-528,  
921 doi:10.1002/humu.24343 (2022).
- 922 34 Cugusi, S. *et al.* Heat shock induces premature transcript termination and  
923 reconfigures the human transcriptome. *Mol Cell* **82**, 1573-1588 e1510,  
924 doi:10.1016/j.molcel.2022.01.007 (2022).
- 925 35 Oh, J. M. *et al.* U1 snRNP regulates cancer cell migration and invasion in vitro. *Nat*  
926 *Commun* **11**, 1, doi:10.1038/s41467-019-13993-7 (2020).
- 927 36 So, B. R. *et al.* A Complex of U1 snRNP with Cleavage and Polyadenylation Factors  
928 Controls Telescripting, Regulating mRNA Transcription in Human Cells. *Mol Cell* **79**,  
929 doi:10.1016/j.molcel.2019.08.007 (2019).
- 930 37 Chu, C. *et al.* Systematic discovery of Xist RNA binding proteins. *Cell* **161**, 404-416,  
931 doi:10.1016/j.cell.2015.03.025 (2015).
- 932 38 Raczynska, K. D. *et al.* The SERRATE protein is involved in alternative splicing in  
933 Arabidopsis thaliana. *Nucleic Acids Res* **42**, 1224-1244, doi:10.1093/nar/gkt894  
934 (2014).
- 935 39 Jia, T. *et al.* The Arabidopsis MOS4-Associated Complex Promotes MicroRNA  
936 Biogenesis and Precursor Messenger RNA Splicing. *Plant Cell* **29**, 2626-2643,  
937 doi:10.1105/tpc.17.00370 (2017).
- 938 40 Laubinger, S. *et al.* Dual roles of the nuclear cap-binding complex and SERRATE in  
939 pre-mRNA splicing and microRNA processing in Arabidopsis thaliana. *Proc Natl*  
940 *Acad Sci U S A* **105**, 8795-8800, doi:10.1073/pnas.0802493105 (2008).
- 941 41 Szklarczyk, D. *et al.* The STRING database in 2023: protein-protein association  
942 networks and functional enrichment analyses for any sequenced genome of  
943 interest. *Nucleic Acids Res* **51**, D638-D646, doi:10.1093/nar/gkac1000 (2023).

- 944 42 Shen, S. *et al.* rMATS: robust and flexible detection of differential alternative splicing  
945 from replicate RNA-Seq data. *Proc Natl Acad Sci U S A* **111**, E5593-5601,  
946 doi:10.1073/pnas.1419161111 (2014).
- 947 43 Morcos, P. A. Achieving targeted and quantifiable alteration of mRNA splicing with  
948 Morpholino oligos. *Biochem Biophys Res Commun* **358**, 521-527,  
949 doi:10.1016/j.bbrc.2007.04.172 (2007).
- 950 44 Proudfoot, N. J. Ending the message: poly(A) signals then and now. *Genes Dev* **25**,  
951 1770-1782, doi:10.1101/gad.17268411 (2011).
- 952 45 Boreikaite, V. & Passmore, L. A. 3'-End Processing of Eukaryotic mRNA:  
953 Machinery, Regulation, and Impact on Gene Expression. *Annu Rev Biochem* **92**,  
954 199-225, doi:10.1146/annurev-biochem-052521-012445 (2023).
- 955 46 Loke, J. C. *et al.* Compilation of mRNA polyadenylation signals in Arabidopsis  
956 revealed a new signal element and potential secondary structures. *Plant Physiol*  
957 **138**, 1457-1468, doi:10.1104/pp.105.060541 (2005).
- 958 47 Hunt, A. G., Xing, D. & Li, Q. Q. Plant polyadenylation factors: conservation and  
959 variety in the polyadenylation complex in plants. *BMC Genomics* **13**, 641,  
960 doi:10.1186/1471-2164-13-641 (2012).
- 961 48 Zhang, S. *et al.* New insights into Arabidopsis transcriptome complexity revealed by  
962 direct sequencing of native RNAs. *Nucleic Acids Res* **48**, 7700-7711,  
963 doi:10.1093/nar/gkaa588 (2020).
- 964 49 Xu, R. *et al.* The 73 kD subunit of the cleavage and polyadenylation specificity  
965 factor (CPSF) complex affects reproductive development in Arabidopsis. *Plant Mol*  
966 *Biol* **61**, 799-815, doi:10.1007/s11103-006-0051-6 (2006).
- 967 50 Xu, R., Ye, X. & Quinn Li, Q. AtCPSF73-II gene encoding an Arabidopsis homolog  
968 of CPSF 73 kDa subunit is critical for early embryo development. *Gene* **324**, 35-45,  
969 doi:10.1016/j.gene.2003.09.025 (2004).
- 970 51 Liu, Y. *et al.* snRNA 3' End Processing by a CPSF73-Containing Complex Essential  
971 for Development in Arabidopsis. *PLoS Biol* **14**, e1002571,  
972 doi:10.1371/journal.pbio.1002571 (2016).
- 973 52 Simpson, G. G., Dijkwel, P. P., Quesada, V., Henderson, I. & Dean, C. FY Is an  
974 RNA 3' End-Processing Factor that Interacts with FCA to Control the Arabidopsis  
975 Floral Transition. *Cell* **113**, 777-787, doi:10.1016/s0092-8674(03)00425-2 (2003).
- 976 53 Yu, Z., Lin, J. & Li, Q. Q. Transcriptome Analyses of FY Mutants Reveal Its Role in  
977 mRNA Alternative Polyadenylation. *Plant Cell* **31**, 2332-2352,  
978 doi:10.1105/tpc.18.00545 (2019).



- 979 54 Schonemann, L. *et al.* Reconstitution of CPSF active in polyadenylation: recognition  
980 of the polyadenylation signal by WDR33. *Genes Dev* **28**, 2381-2393,  
981 doi:10.1101/gad.250985.114 (2014).
- 982 55 Hou, Y. *et al.* CPSF30-L-mediated recognition of mRNA m(6)A modification controls  
983 alternative polyadenylation of nitrate signaling-related gene transcripts in  
984 Arabidopsis. *Mol Plant* **14**, 688-699, doi:10.1016/j.molp.2021.01.013 (2021).
- 985 56 Song, P. *et al.* Arabidopsis N(6)-methyladenosine reader CPSF30-L recognizes  
986 FUE signals to control polyadenylation site choice in liquid-like nuclear bodies. *Mol*  
987 *Plant* **14**, 571-587, doi:10.1016/j.molp.2021.01.014 (2021).
- 988 57 Hong, L. *et al.* Alternative polyadenylation is involved in auxin-based plant growth  
989 and development. *Plant J* **93**, 246-258, doi:10.1111/tpj.13771 (2018).
- 990 58 Tellez-Robledo, B. *et al.* The polyadenylation factor FIP1 is important for plant  
991 development and root responses to abiotic stresses. *Plant J* **99**, 1203-1219,  
992 doi:10.1111/tpj.14416 (2019).
- 993 59 Wang, C. *et al.* FIP1 Plays an Important Role in Nitrate Signaling and Regulates  
994 CIPK8 and CIPK23 Expression in Arabidopsis. *Front Plant Sci* **9**, 593,  
995 doi:10.3389/fpls.2018.00593 (2018).
- 996 60 Lin, J., Xu, R., Wu, X., Shen, Y. & Li, Q. Q. Role of cleavage and polyadenylation  
997 specificity factor 100: anchoring poly(A) sites and modulating transcription  
998 termination. *Plant J* **91**, 829-839, doi:10.1111/tpj.13611 (2017).
- 999 61 Rot, G. *et al.* High-Resolution RNA Maps Suggest Common Principles of Splicing  
1000 and Polyadenylation Regulation by TDP-43. *Cell Rep* **19**, 1056-1067,  
1001 doi:10.1016/j.celrep.2017.04.028 (2017).
- 1002 62 Eaton, J. D., Francis, L., Davidson, L. & West, S. A unified allosteric/torpedo  
1003 mechanism for transcriptional termination on human protein-coding genes. *Genes*  
1004 *Dev* **34**, 132-145, doi:10.1101/gad.332833.119 (2020).
- 1005 63 Fong, N. *et al.* Effects of Transcription Elongation Rate and Xrn2 Exonuclease  
1006 Activity on RNA Polymerase II Termination Suggest Widespread Kinetic  
1007 Competition. *Mol Cell* **60**, 256-267, doi:10.1016/j.molcel.2015.09.026 (2015).
- 1008 64 Hogg, J. R. & Goff, S. P. Upf1 senses 3'UTR length to potentiate mRNA decay. *Cell*  
1009 **143**, 379-389, doi:10.1016/j.cell.2010.10.005 (2010).
- 1010 65 Kertesz, S. *et al.* Both introns and long 3'-UTRs operate as cis-acting elements to  
1011 trigger nonsense-mediated decay in plants. *Nucleic Acids Res* **34**, 6147-6157,  
1012 doi:10.1093/nar/gkl737 (2006).
- 1013 66 Yi, W. *et al.* CRISPR-assisted detection of RNA-protein interactions in living cells.  
1014 *Nat Methods* **17**, 685-688, doi:10.1038/s41592-020-0866-0 (2020).

- 1015 67 Yang, X. *et al.* Proximity labeling: an emerging tool for probing in planta molecular  
1016 interactions. *Plant Commun* **2**, 100137, doi:10.1016/j.xplc.2020.100137 (2021).
- 1017 68 Qin, W., Cho, K. F., Cavanagh, P. E. & Ting, A. Y. Deciphering molecular  
1018 interactions by proximity labeling. *Nat Methods* **18**, 133-143, doi:10.1038/s41592-  
1019 020-01010-5 (2021).
- 1020 69 Grawe, C., Stelloo, S., van Hout, F. A. H. & Vermeulen, M. RNA-Centric Methods:  
1021 Toward the Interactome of Specific RNA Transcripts. *Trends Biotechnol* **39**, 890-  
1022 900, doi:10.1016/j.tibtech.2020.11.011 (2021).
- 1023 70 Burjoski, V. & Reddy, A. S. N. The Landscape of RNA-Protein Interactions in Plants:  
1024 Approaches and Current Status. *Int J Mol Sci* **22**, doi:10.3390/ijms22062845 (2021).
- 1025 71 Saldi, T., Wilusz, C., MacMorris, M. & Blumenthal, T. Functional redundancy of  
1026 worm spliceosomal proteins U1A and U2B". *Proc Natl Acad Sci U S A* **104**, 9753-  
1027 9757, doi:10.1073/pnas.0701720104 (2007).
- 1028 72 Delaney, K. J., Williams, S. G., Lawler, M. & Hall, K. B. Climbing the vertebrate  
1029 branch of U1A/U2B" protein evolution. *RNA* **20**, 1035-1045,  
1030 doi:10.1261/rna.044255.114 (2014).
- 1031 73 Simpson, G. G. *et al.* Molecular characterization of the spliceosomal proteins U1A  
1032 and U2B" from higher plants. *Embo J* **14**, 4540-4550, doi:10.1002/j.1460-  
1033 2075.1995.tb00133.x (1995).
- 1034 74 Terzi, L. C. & Simpson, G. G. Arabidopsis RNA immunoprecipitation. *Plant J* **59**,  
1035 163-168, doi:10.1111/j.1365-313X.2009.03859.x (2009).
- 1036 75 Li, W. *et al.* Systematic profiling of poly(A)+ transcripts modulated by core 3' end  
1037 processing and splicing factors reveals regulatory rules of alternative cleavage and  
1038 polyadenylation. *PLoS Genet* **11**, e1005166, doi:10.1371/journal.pgen.1005166  
1039 (2015).
- 1040 76 Liu, F., Marquardt, S., Lister, C., Swiezewski, S. & Dean, C. Targeted 3' processing  
1041 of antisense transcripts triggers Arabidopsis FLC chromatin silencing. *Science* **327**,  
1042 94-97, doi:10.1126/science.1180278 (2010).
- 1043 77 Hornyik, C., Terzi, L. C. & Simpson, G. G. The spen family protein FPA controls  
1044 alternative cleavage and polyadenylation of RNA. *Dev Cell* **18**, 203-213,  
1045 doi:10.1016/j.devcel.2009.12.009 (2010).
- 1046 78 Zhang, Y. *et al.* Integrative genome-wide analysis reveals HLP1, a novel RNA-  
1047 binding protein, regulates plant flowering by targeting alternative polyadenylation.  
1048 *Cell Res* **25**, 864-876, doi:10.1038/cr.2015.77 (2015).
- 1049 79 Lin, J. *et al.* HDA6-dependent histone deacetylation regulates mRNA  
1050 polyadenylation in Arabidopsis. *Genome Res* **30**, 1407-1417,  
1051 doi:10.1101/gr.255232.119 (2020).

- 1052 80 Zhang, X. *et al.* CFI 25 Subunit of Cleavage Factor I is Important for Maintaining the  
1053 Diversity of 3' UTR Lengths in Arabidopsis thaliana (L.) Heynh. *Plant Cell Physiol*  
1054 **63**, 369-383, doi:10.1093/pcp/pcac002 (2022).
- 1055 81 Wu, X. *et al.* Genome-wide landscape of polyadenylation in Arabidopsis provides  
1056 evidence for extensive alternative polyadenylation. *Proc Natl Acad Sci U S A* **108**,  
1057 12533-12538, doi:10.1073/pnas.1019732108 (2011).
- 1058 82 Sherstnev, A. *et al.* Direct sequencing of Arabidopsis thaliana RNA reveals patterns  
1059 of cleavage and polyadenylation. *Nat Struct Mol Biol* **19**, 845-852,  
1060 doi:10.1038/nsmb.2345 (2012).
- 1061 83 Parker, M. T. *et al.* Widespread premature transcription termination of Arabidopsis  
1062 thaliana NLR genes by the spen protein FPA. *Elife* **10**, doi:10.7554/eLife.65537  
1063 (2021).
- 1064 84 Cyrek, M. *et al.* Seed Dormancy in Arabidopsis Is Controlled by Alternative  
1065 Polyadenylation of DOG1. *Plant Physiol* **170**, 947-955, doi:10.1104/pp.15.01483  
1066 (2016).
- 1067 85 Duc, C., Sherstnev, A., Cole, C., Barton, G. J. & Simpson, G. G. Transcription  
1068 termination and chimeric RNA formation controlled by Arabidopsis thaliana FPA.  
1069 *PLoS Genet* **9**, e1003867, doi:10.1371/journal.pgen.1003867 (2013).
- 1070 86 Guo, C., Spinelli, M., Liu, M., Li, Q. Q. & Liang, C. A Genome-wide Study of "Non-  
1071 3UTR" Polyadenylation Sites in Arabidopsis thaliana. *Sci Rep* **6**, 28060,  
1072 doi:10.1038/srep28060 (2016).
- 1073 87 Fu, H. *et al.* Genome-wide dynamics of alternative polyadenylation in rice. *Genome*  
1074 *Res* **26**, 1753-1760, doi:10.1101/gr.210757.116 (2016).
- 1075 88 Zhou, Q. *et al.* Differential alternative polyadenylation contributes to the  
1076 developmental divergence between two rice subspecies, japonica and indica. *Plant*  
1077 *J* **98**, 260-276, doi:10.1111/tpj.14209 (2019).
- 1078 89 Ossowski, S., Schwab, R. & Weigel, D. Gene silencing in plants using artificial  
1079 microRNAs and other small RNAs. *Plant J* **53**, 674-690, doi:10.1111/j.1365-  
1080 313X.2007.03328.x (2008).
- 1081 90 Schwab, R., Ossowski, S., Riester, M., Warthmann, N. & Weigel, D. Highly specific  
1082 gene silencing by artificial microRNAs in Arabidopsis. *Plant Cell* **18**, 1121-1133,  
1083 doi:10.1105/tpc.105.039834 (2006).
- 1084 91 Nakagawa, T. *et al.* Improved Gateway binary vectors: high-performance vectors for  
1085 creation of fusion constructs in transgenic analysis of plants. *Biosci Biotechnol*  
1086 *Biochem* **71**, 2095-2100, doi:10.1271/bbb.70216 (2007).

- 1087 92 Clough, S. J. & Bent, A. F. Floral dip: a simplified method for *Agrobacterium*-  
1088 mediated transformation of *Arabidopsis thaliana*. *Plant J* **16**, 735-743,  
1089 doi:10.1046/j.1365-313x.1998.00343.x (1998).
- 1090 93 Martin, M. Cutadapt removes adapter sequences from high-throughput sequencing  
1091 reads. *EMBnet.journal* **17**, doi:10.14806/ej.17.1.200 (2011).
- 1092 94 Zhang, R. *et al.* A high-resolution single-molecule sequencing-based *Arabidopsis*  
1093 transcriptome using novel methods of Iso-seq analysis. *Genome Biol* **23**, 149,  
1094 doi:10.1186/s13059-022-02711-0 (2022).
- 1095 95 Kim, D., Paggi, J. M., Park, C., Bennett, C. & Salzberg, S. L. Graph-based genome  
1096 alignment and genotyping with HISAT2 and HISAT-genotype. *Nat Biotechnol* **37**,  
1097 907-915, doi:10.1038/s41587-019-0201-4 (2019).
- 1098 96 Ewels, P., Magnusson, M., Lundin, S. & Kaller, M. MultiQC: summarize analysis  
1099 results for multiple tools and samples in a single report. *Bioinformatics* **32**, 3047-  
1100 3048, doi:10.1093/bioinformatics/btw354 (2016).
- 1101 97 Srivastava, A., Malik, L., Smith, T., Sudbery, I. & Patro, R. Alevin efficiently  
1102 estimates accurate gene abundances from dscRNA-seq data. *Genome Biol* **20**, 65,  
1103 doi:10.1186/s13059-019-1670-y (2019).
- 1104 98 Sonesson, C., Love, M. I. & Robinson, M. D. Differential analyses for RNA-seq:  
1105 transcript-level estimates improve gene-level inferences. *F1000Res* **4**, 1521,  
1106 doi:10.12688/f1000research.7563.2 (2015).
- 1107 99 Love, M. I., Huber, W. & Anders, S. Moderated estimation of fold change and  
1108 dispersion for RNA-seq data with DESeq2. *Genome Biol* **15**, 550,  
1109 doi:10.1186/s13059-014-0550-8 (2014).
- 1110 100 *ggplot2*. (2016).
- 1111 101 Lamesch, P. *et al.* The *Arabidopsis* Information Resource (TAIR): improved gene  
1112 annotation and new tools. *Nucleic Acids Res* **40**, D1202-1210,  
1113 doi:10.1093/nar/gkr1090 (2012).
- 1114 102 Li, H. *et al.* The Sequence Alignment/Map format and SAMtools. *Bioinformatics* **25**,  
1115 2078-2079, doi:10.1093/bioinformatics/btp352 (2009).
- 1116 103 Shen, W., Le, S., Li, Y. & Hu, F. SeqKit: A Cross-Platform and Ultrafast Toolkit for  
1117 FASTA/Q File Manipulation. *PLoS One* **11**, e0163962,  
1118 doi:10.1371/journal.pone.0163962 (2016).
- 1119 104 Di Tommaso, P. *et al.* Nextflow enables reproducible computational workflows. *Nat*  
1120 *Biotechnol* **35**, 316-319, doi:10.1038/nbt.3820 (2017).
- 1121 105 Kurtzer, G. M., Sochat, V. & Bauer, M. W. Singularity: Scientific containers for  
1122 mobility of compute. *PLoS One* **12**, e0177459, doi:10.1371/journal.pone.0177459  
1123 (2017).

- 1124 106 Galaxy, C. The Galaxy platform for accessible, reproducible and collaborative  
1125 biomedical analyses: 2022 update. *Nucleic Acids Res* **50**, W345-W351,  
1126 doi:10.1093/nar/gkac247 (2022).
- 1127 107 Zerbino, D. R., Johnson, N., Juettemann, T., Wilder, S. P. & Flicek, P. WiggleTools:  
1128 parallel processing of large collections of genome-wide datasets for visualization  
1129 and statistical analysis. *Bioinformatics* **30**, 1008-1009,  
1130 doi:10.1093/bioinformatics/btt737 (2014).
- 1131 108 Li, H. Minimap2: pairwise alignment for nucleotide sequences. *Bioinformatics* **34**,  
1132 3094-3100, doi:10.1093/bioinformatics/bty191 (2018).
- 1133 109 Mukherjee, J. *et al.* beta-Actin mRNA interactome mapping by proximity  
1134 biotinylation. *Proc Natl Acad Sci U S A* **116**, 12863-12872,  
1135 doi:10.1073/pnas.1820737116 (2019).
- 1136 110 Rappsilber, J., Mann, M. & Ishihama, Y. Protocol for micro-purification, enrichment,  
1137 pre-fractionation and storage of peptides for proteomics using StageTips. *Nat*  
1138 *Protoc* **2**, 1896-1906, doi:10.1038/nprot.2007.261 (2007).
- 1139 111 Franz-Wachtel, M. *et al.* Global detection of protein kinase D-dependent  
1140 phosphorylation events in nocodazole-treated human cells. *Mol Cell Proteomics* **11**,  
1141 160-170, doi:10.1074/mcp.M111.016014 (2012).
- 1142 112 Cox, J. & Mann, M. MaxQuant enables high peptide identification rates,  
1143 individualized p.p.b.-range mass accuracies and proteome-wide protein  
1144 quantification. *Nat Biotechnol* **26**, 1367-1372, doi:10.1038/nbt.1511 (2008).
- 1145 113 Cox, J. *et al.* Andromeda: a peptide search engine integrated into the MaxQuant  
1146 environment. *J Proteome Res* **10**, 1794-1805, doi:10.1021/pr101065j (2011).
- 1147 114 Elias, J. E. & Gygi, S. P. Target-decoy search strategy for increased confidence in  
1148 large-scale protein identifications by mass spectrometry. *Nat Methods* **4**, 207-214,  
1149 doi:10.1038/nmeth1019 (2007).
- 1150 115 Singh, S., Hein, M. Y. & Stewart, A. F. msVolcano: A flexible web application for  
1151 visualizing quantitative proteomics data. *Proteomics* **16**, 2491-2494,  
1152 doi:10.1002/pmic.201600167 (2016).
- 1153 116 Speth, C. *et al.* Arabidopsis RNA processing factor SERRATE regulates the  
1154 transcription of intronless genes. *Elife* **7**, doi:10.7554/eLife.37078 (2018).
- 1155 117 Zhang, Y. *et al.* Model-based analysis of ChIP-Seq (MACS). *Genome Biol* **9**, R137,  
1156 doi:10.1186/gb-2008-9-9-r137 (2008).
- 1157 118 Ramirez, F. *et al.* deepTools2: a next generation web server for deep-sequencing  
1158 data analysis. *Nucleic Acids Res* **44**, W160-165, doi:10.1093/nar/gkw257 (2016).
- 1159 119 Long, Y., Jia, J., Mo, W., Jin, X. & Zhai, J. FLEP-seq: simultaneous detection of  
1160 RNA polymerase II position, splicing status, polyadenylation site and poly(A) tail

Mangilet et al.

The Arabidopsis U1 snRNP regulates mRNA 3'-end processing

1161 length at genome-wide scale by single-molecule nascent RNA sequencing. *Nat*

1162 *Protoc* **16**, 4355-4381, doi:10.1038/s41596-021-00581-7 (2021).

1163
